# Supplementary material for: Optimizing High-Speed Railroad Timetable with Passenger and Station Service Demands: A Case Study in the Wuhan-Guangzhou Corridor
Source: Hindawi journal article supplement (doi:10.1155/2018/4530787), 2018-09-24
Supplement: f1 [file 4530787.f1.txt]

Paths	//arcProperty:0-sec arc,1-sta passing arc,2-sta dwell arc,3-addi-waiting arc
1:1	//trainNo: pathNo
1,957,1,957,2	//arc para (depSta,depTime (s),arrSta,arrTime (s),arcProperty)
1,957,2,971,0
2,971,2,971,1
2,971,3,979,0
3,979,3,979,1
3,979,4,988,0
4,988,4,988,1
4,988,5,1007,0
5,1007,5,1008,2
5,1008,5,1009,3
5,1009,6,1026,0
6,1026,6,1026,1
6,1026,7,1043,0
7,1043,7,1044,2
7,1044,7,1045,3
7,1045,7,1046,3
7,1046,7,1047,3
7,1047,7,1048,3
7,1048,7,1049,3
7,1049,8,1061,0
8,1061,8,1061,1
8,1061,9,1078,0
9,1078,9,1079,2
9,1079,9,1080,3
9,1080,10,1090,0
10,1090,10,1090,1
10,1090,11,1102,0
11,1102,11,1102,1
11,1102,12,1121,0
12,1121,12,1122,2
12,1122,12,1123,3
12,1123,13,1142,0
13,1142,13,1142,1
13,1142,14,1151,0
14,1151,14,1151,1
14,1151,15,1166,0
15,1166,15,1166,1
15,1166,16,1181,0
16,1181,16,1182,2
16,1182,16,1183,3
16,1183,17,1192,0
17,1192,17,1192,1
17,1192,18,1210,0
2:2
1,1083,1,1083,2
1,1083,2,1097,0
2,1097,2,1097,1
2,1097,3,1105,0
3,1105,3,1105,1
3,1105,4,1114,0
4,1114,4,1114,1
4,1114,5,1133,0
5,1133,5,1134,2
5,1134,5,1135,3
5,1135,6,1152,0
6,1152,6,1152,1
6,1152,7,1169,0
7,1169,7,1170,2
7,1170,7,1171,3
7,1171,7,1172,3
7,1172,7,1173,3
7,1173,8,1185,0
8,1185,8,1185,1
8,1185,9,1202,0
9,1202,9,1203,2
9,1203,9,1204,3
9,1204,10,1214,0
10,1214,10,1214,1
10,1214,11,1226,0
11,1226,11,1226,1
11,1226,12,1245,0
12,1245,12,1246,2
12,1246,12,1247,3
12,1247,13,1266,0
13,1266,13,1266,1
13,1266,14,1278,0
14,1278,14,1279,2
14,1279,14,1280,3
14,1280,15,1297,0
15,1297,15,1297,1
15,1297,16,1309,0
16,1309,16,1309,1
16,1309,17,1316,0
17,1316,17,1316,1
17,1316,18,1334,0
3:3
1,1095,1,1095,2
1,1095,2,1109,0
2,1109,2,1109,1
2,1109,3,1117,0
3,1117,3,1117,1
3,1117,4,1126,0
4,1126,4,1126,1
4,1126,5,1142,0
5,1142,5,1142,1
5,1142,6,1157,0
6,1157,6,1157,1
6,1157,7,1174,0
7,1174,7,1175,2
7,1175,7,1176,3
7,1176,7,1177,3
7,1177,7,1178,3
7,1178,8,1193,0
8,1193,8,1194,2
8,1194,8,1195,3
8,1195,9,1211,0
9,1211,9,1211,1
9,1211,10,1222,0
10,1222,10,1223,2
10,1223,10,1224,3
10,1224,11,1238,0
11,1238,11,1238,1
11,1238,12,1254,0
12,1254,12,1254,1
12,1254,13,1271,0
13,1271,13,1271,1
13,1271,14,1283,0
14,1283,14,1284,2
14,1284,14,1285,3
14,1285,15,1302,0
15,1302,15,1302,1
15,1302,16,1314,0
16,1314,16,1314,1
16,1314,17,1321,0
17,1321,17,1321,1
17,1321,18,1339,0
4:4
1,789,1,789,2
1,789,2,803,0
2,803,2,803,1
2,803,3,811,0
3,811,3,811,1
3,811,4,820,0
4,820,4,820,1
4,820,5,836,0
5,836,5,836,1
5,836,6,851,0
6,851,6,851,1
6,851,7,868,0
7,868,7,869,2
7,869,7,870,3
7,870,7,871,3
7,871,7,872,3
7,872,7,873,3
7,873,7,874,3
7,874,7,875,3
7,875,7,876,3
7,876,8,891,0
8,891,8,892,2
8,892,8,893,3
8,893,9,909,0
9,909,9,909,1
9,909,10,920,0
10,920,10,921,2
10,921,10,922,3
10,922,11,939,0
11,939,11,940,2
11,940,11,941,3
11,941,11,942,3
11,942,11,943,3
11,943,11,944,3
11,944,11,945,3
11,945,11,946,3
11,946,11,947,3
11,947,11,948,3
11,948,11,949,3
11,949,11,950,3
11,950,12,968,0
12,968,12,968,1
12,968,13,985,0
13,985,13,985,1
13,985,14,997,0
14,997,14,998,2
14,998,14,999,3
14,999,14,1000,3
14,1000,14,1001,3
14,1001,14,1002,3
14,1002,14,1003,3
14,1003,14,1004,3
14,1004,15,1021,0
15,1021,15,1021,1
15,1021,16,1033,0
16,1033,16,1033,1
16,1033,17,1040,0
17,1040,17,1040,1
17,1040,18,1057,0
18,1057,18,1058,2
5:5
1,867,1,867,2
1,867,2,881,0
2,881,2,881,1
2,881,3,889,0
3,889,3,889,1
3,889,4,898,0
4,898,4,898,1
4,898,5,914,0
5,914,5,914,1
5,914,6,932,0
6,932,6,933,2
6,933,6,934,3
6,934,7,953,0
7,953,7,954,2
7,954,7,955,3
7,955,7,956,3
7,956,8,968,0
8,968,8,968,1
8,968,9,982,0
9,982,9,982,1
9,982,10,991,0
10,991,10,991,1
10,991,11,1003,0
11,1003,11,1003,1
11,1003,12,1022,0
12,1022,12,1023,2
12,1023,12,1024,3
12,1024,13,1043,0
13,1043,13,1043,1
13,1043,14,1052,0
14,1052,14,1052,1
14,1052,15,1067,0
15,1067,15,1067,1
15,1067,16,1082,0
16,1082,16,1083,2
16,1083,16,1084,3
16,1084,17,1093,0
17,1093,17,1093,1
17,1093,18,1110,0
18,1110,18,1111,2
6:6
1,1013,1,1013,2
1,1013,2,1027,0
2,1027,2,1027,1
2,1027,3,1035,0
3,1035,3,1035,1
3,1035,4,1044,0
4,1044,4,1044,1
4,1044,5,1060,0
5,1060,5,1060,1
5,1060,6,1075,0
6,1075,6,1075,1
6,1075,7,1092,0
7,1092,7,1093,2
7,1093,7,1094,3
7,1094,7,1095,3
7,1095,7,1096,3
7,1096,8,1111,0
8,1111,8,1112,2
8,1112,8,1113,3
8,1113,9,1129,0
9,1129,9,1129,1
9,1129,10,1140,0
10,1140,10,1141,2
10,1141,10,1142,3
10,1142,11,1156,0
11,1156,11,1156,1
11,1156,12,1172,0
12,1172,12,1172,1
12,1172,13,1189,0
13,1189,13,1189,1
13,1189,14,1201,0
14,1201,14,1202,2
14,1202,14,1203,3
14,1203,15,1220,0
15,1220,15,1220,1
15,1220,16,1232,0
16,1232,16,1232,1
16,1232,17,1239,0
17,1239,17,1239,1
17,1239,18,1257,0
18,1257,18,1258,2
7:7
1,540,2,554,0
2,554,2,554,1
2,554,3,562,0
3,562,3,562,1
3,562,4,571,0
4,571,4,571,1
4,571,5,587,0
5,587,5,587,1
5,587,6,602,0
6,602,6,602,1
6,602,7,619,0
7,619,7,620,2
7,620,7,621,3
7,621,7,622,3
7,622,8,634,0
8,634,8,634,1
8,634,9,648,0
9,648,9,648,1
9,648,10,656,0
10,656,10,656,1
10,656,11,668,0
11,668,11,668,1
11,668,12,684,0
12,684,12,684,1
12,684,13,701,0
13,701,13,701,1
13,701,14,710,0
14,710,14,710,1
14,710,15,725,0
15,725,15,725,1
15,725,16,737,0
16,737,16,737,1
16,737,17,744,0
17,744,17,744,1
17,744,18,761,0
18,761,18,762,2
8:8
1,860,1,860,2
1,860,2,874,0
2,874,2,874,1
2,874,3,882,0
3,882,3,882,1
3,882,4,891,0
4,891,4,891,1
4,891,5,907,0
5,907,5,907,1
5,907,6,922,0
6,922,6,922,1
6,922,7,939,0
7,939,7,940,2
7,940,7,941,3
7,941,7,942,3
7,942,8,954,0
8,954,8,954,1
8,954,9,968,0
9,968,9,968,1
9,968,10,976,0
10,976,10,976,1
10,976,11,988,0
11,988,11,988,1
11,988,12,1004,0
12,1004,12,1004,1
12,1004,13,1021,0
13,1021,13,1021,1
13,1021,14,1030,0
14,1030,14,1030,1
14,1030,15,1045,0
15,1045,15,1045,1
15,1045,16,1057,0
16,1057,16,1057,1
16,1057,17,1064,0
17,1064,17,1064,1
17,1064,18,1079,0
18,1079,18,1080,2
9:9
1,802,1,802,2
1,802,2,816,0
2,816,2,816,1
2,816,3,823,0
3,823,3,823,1
3,823,4,832,0
4,832,4,832,1
4,832,5,849,0
5,849,5,849,1
5,849,6,863,0
6,863,6,863,1
6,863,7,881,0
10:10
1,599,1,599,2
1,599,2,613,0
2,613,2,613,1
2,613,3,620,0
3,620,3,620,1
3,620,4,629,0
4,629,4,629,1
4,629,5,646,0
5,646,5,646,1
5,646,6,660,0
6,660,6,660,1
6,660,7,677,0
7,677,7,678,2
7,678,7,679,3
7,679,7,680,3
7,680,8,693,0
8,693,8,693,1
8,693,9,707,0
9,707,9,707,1
9,707,10,718,0
10,718,10,719,2
10,719,10,720,3
10,720,11,733,0
11,733,11,733,1
11,733,12,749,0
12,749,12,749,1
12,749,13,767,0
13,767,13,767,1
13,767,14,776,0
14,776,14,776,1
14,776,15,791,0
15,791,15,791,1
15,791,16,802,0
16,802,16,802,1
16,802,17,810,0
17,810,17,810,1
17,810,18,827,0
11:11
1,832,1,832,2
1,832,2,846,0
2,846,2,846,1
2,846,3,853,0
3,853,3,853,1
3,853,4,862,0
4,862,4,862,1
4,862,5,879,0
5,879,5,879,1
5,879,6,893,0
6,893,6,893,1
6,893,7,910,0
7,910,7,911,2
7,911,7,912,3
7,912,7,913,3
7,913,8,925,0
8,925,8,925,1
8,925,9,939,0
9,939,9,939,1
9,939,10,948,0
10,948,10,948,1
10,948,11,959,0
11,959,11,959,1
11,959,12,975,0
12,975,12,975,1
12,975,13,993,0
13,993,13,993,1
13,993,14,1002,0
14,1002,14,1002,1
14,1002,15,1016,0
15,1016,15,1016,1
15,1016,16,1028,0
16,1028,16,1028,1
16,1028,17,1036,0
17,1036,17,1036,1
17,1036,18,1050,0
12:12
1,883,1,883,2
1,883,2,897,0
2,897,2,897,1
2,897,3,908,0
3,908,3,909,2
3,909,3,910,3
3,910,4,921,0
4,921,4,921,1
4,921,5,940,0
5,940,5,941,2
5,941,5,942,3
5,942,6,959,0
6,959,6,959,1
6,959,7,976,0
7,976,7,977,2
7,977,7,978,3
7,978,7,979,3
7,979,7,980,3
7,980,7,981,3
7,981,7,982,3
7,982,8,994,0
8,994,8,994,1
8,994,9,1008,0
9,1008,9,1008,1
9,1008,10,1019,0
10,1019,10,1020,2
13:13
1,739,1,739,2
1,739,2,753,0
2,753,2,753,1
2,753,3,760,0
3,760,3,760,1
3,760,4,772,0
4,772,4,773,2
4,773,4,774,3
4,774,4,775,3
4,775,5,794,0
5,794,5,794,1
5,794,6,811,0
6,811,6,812,2
6,812,6,813,3
6,813,7,832,0
7,832,7,833,2
7,833,7,834,3
7,834,7,835,3
7,835,8,847,0
8,847,8,847,1
8,847,9,861,0
9,861,9,861,1
9,861,10,873,0
10,873,10,874,2
14:14
1,613,1,613,2
1,613,2,627,0
2,627,2,627,1
2,627,3,638,0
3,638,3,639,2
3,639,3,640,3
3,640,4,651,0
4,651,4,651,1
4,651,5,670,0
5,670,5,671,2
5,671,5,672,3
5,672,6,689,0
6,689,6,689,1
6,689,7,706,0
7,706,7,707,2
7,707,7,708,3
7,708,7,709,3
7,709,8,721,0
8,721,8,721,1
8,721,9,735,0
9,735,9,735,1
9,735,10,746,0
10,746,10,747,2
15:15
1,426,2,440,0
2,440,2,440,1
2,440,3,451,0
3,451,3,452,2
3,452,3,453,3
3,453,4,464,0
4,464,4,464,1
4,464,5,483,0
5,483,5,484,2
5,484,5,485,3
5,485,6,502,0
6,502,6,502,1
6,502,7,519,0
7,519,7,520,2
7,520,7,521,3
7,521,7,522,3
7,522,7,523,3
7,523,8,538,0
8,538,8,539,2
8,539,8,540,3
8,540,9,556,0
9,556,9,556,1
9,556,10,567,0
10,567,10,568,2
16:16
1,925,2,939,0
2,939,2,939,1
2,939,3,947,0
3,947,3,947,1
3,947,4,959,0
4,959,4,960,2
4,960,4,961,3
4,961,5,979,0
5,979,5,979,1
5,979,6,994,0
6,994,6,994,1
6,994,7,1011,0
7,1011,7,1012,2
7,1012,7,1013,3
7,1013,7,1014,3
7,1014,8,1026,0
8,1026,8,1026,1
8,1026,9,1040,0
9,1040,9,1040,1
9,1040,10,1051,0
10,1051,10,1052,2
17:17
1,758,1,758,2
1,758,2,772,0
2,772,2,772,1
2,772,3,783,0
3,783,3,784,2
3,784,3,785,3
3,785,4,796,0
4,796,4,796,1
4,796,5,812,0
5,812,5,812,1
5,812,6,830,0
6,830,6,831,2
6,831,6,832,3
6,832,7,852,0
18:18
1,1190,1,1190,2
1,1190,2,1204,0
2,1204,2,1204,1
2,1204,3,1212,0
3,1212,3,1212,1
3,1212,4,1224,0
4,1224,4,1225,2
4,1225,4,1226,3
4,1226,5,1247,0
5,1247,5,1248,2
5,1248,5,1249,3
5,1249,6,1266,0
6,1266,6,1266,1
6,1266,7,1283,0
19:19
1,1260,1,1260,2
1,1260,2,1274,0
2,1274,2,1274,1
2,1274,3,1284,0
3,1284,3,1285,2
3,1285,3,1286,3
3,1286,4,1297,0
4,1297,4,1297,1
4,1297,5,1317,0
5,1317,5,1318,2
5,1318,5,1319,3
5,1319,6,1335,0
6,1335,6,1335,1
6,1335,7,1352,0
20:20
1,782,1,782,2
1,782,2,796,0
2,796,2,796,1
2,796,3,807,0
3,807,3,808,2
3,808,3,809,3
3,809,3,810,3
3,810,3,811,3
3,811,3,812,3
3,812,3,813,3
3,813,3,814,3
3,814,4,825,0
4,825,4,825,1
4,825,5,844,0
5,844,5,845,2
5,845,5,846,3
5,846,5,847,3
5,847,5,848,3
5,848,5,849,3
5,849,5,850,3
5,850,5,851,3
5,851,5,852,3
5,852,6,869,0
6,869,6,869,1
6,869,7,886,0
7,886,7,887,2
7,887,7,888,3
7,888,7,889,3
7,889,7,890,3
7,890,7,891,3
7,891,7,892,3
7,892,8,905,0
8,905,8,905,1
8,905,9,919,0
9,919,9,919,1
9,919,10,930,0
10,930,10,931,2
21:21
1,809,1,809,2
1,809,2,823,0
2,823,2,823,1
2,823,3,831,0
3,831,3,831,1
3,831,4,840,0
4,840,4,840,1
4,840,5,859,0
5,859,5,859,1
5,859,6,877,0
6,877,6,878,2
6,878,6,879,3
6,879,7,900,0
7,900,7,901,2
7,901,7,902,3
7,902,7,903,3
7,903,7,904,3
7,904,7,905,3
7,905,8,918,0
8,918,8,918,1
8,918,9,932,0
9,932,9,932,1
9,932,10,943,0
10,943,10,944,2
10,944,10,945,3
10,945,10,946,3
10,946,10,947,3
10,947,10,948,3
10,948,10,949,3
10,949,10,950,3
10,950,11,964,0
11,964,11,964,1
11,964,12,983,0
12,983,12,984,2
12,984,12,985,3
12,985,13,1004,0
13,1004,13,1004,1
13,1004,14,1013,0
14,1013,14,1013,1
14,1013,15,1028,0
15,1028,15,1028,1
15,1028,16,1043,0
16,1043,16,1044,2
16,1044,16,1045,3
16,1045,17,1054,0
17,1054,17,1054,1
17,1054,18,1072,0
18,1072,18,1073,2
22:22
7,438,8,451,0
8,451,8,451,1
8,451,9,465,0
9,465,9,465,1
9,465,10,476,0
10,476,10,477,2
23:23
7,870,8,883,0
8,883,8,883,1
8,883,9,898,0
9,898,9,898,1
9,898,10,909,0
10,909,10,910,2
24:24
1,640,1,640,2
1,640,2,654,0
2,654,2,654,1
2,654,3,665,0
3,665,3,666,2
3,666,3,667,3
3,667,4,678,0
4,678,4,678,1
4,678,5,694,0
5,694,5,694,1
5,694,6,709,0
6,709,6,709,1
6,709,7,726,0
7,726,7,727,2
7,727,7,728,3
7,728,7,729,3
7,729,7,730,3
7,730,7,731,3
7,731,7,732,3
7,732,8,744,0
8,744,8,744,1
8,744,9,760,0
9,760,9,760,1
9,760,10,771,0
10,771,10,772,2
10,772,10,773,3
10,773,11,787,0
11,787,11,787,1
11,787,12,803,0
12,803,12,803,1
12,803,13,820,0
13,820,13,820,1
13,820,14,832,0
14,832,14,833,2
14,833,14,834,3
14,834,15,851,0
15,851,15,851,1
15,851,16,863,0
16,863,16,863,1
16,863,17,871,0
17,871,17,871,1
17,871,18,889,0
25:25
1,978,1,978,2
1,978,2,992,0
2,992,2,992,1
2,992,3,1003,0
3,1003,3,1004,2
3,1004,3,1005,3
3,1005,4,1016,0
4,1016,4,1016,1
4,1016,5,1032,0
5,1032,5,1032,1
5,1032,6,1047,0
6,1047,6,1047,1
6,1047,7,1064,0
7,1064,7,1065,2
7,1065,7,1066,3
7,1066,7,1067,3
7,1067,7,1068,3
7,1068,7,1069,3
7,1069,8,1081,0
8,1081,8,1081,1
8,1081,9,1095,0
9,1095,9,1095,1
9,1095,10,1106,0
10,1106,10,1107,2
10,1107,10,1108,3
10,1108,11,1122,0
11,1122,11,1122,1
11,1122,12,1141,0
12,1141,12,1142,2
12,1142,12,1143,3
12,1143,13,1162,0
13,1162,13,1162,1
13,1162,14,1174,0
14,1174,14,1175,2
14,1175,14,1176,3
14,1176,15,1193,0
15,1193,15,1193,1
15,1193,16,1205,0
16,1205,16,1205,1
16,1205,17,1212,0
17,1212,17,1212,1
17,1212,18,1230,0
26:26
1,1134,1,1134,2
1,1134,2,1148,0
2,1148,2,1148,1
2,1148,3,1156,0
3,1156,3,1156,1
3,1156,4,1165,0
4,1165,4,1165,1
4,1165,5,1184,0
5,1184,5,1185,2
5,1185,5,1186,3
5,1186,6,1206,0
6,1206,6,1207,2
6,1207,6,1208,3
6,1208,7,1227,0
7,1227,7,1228,2
7,1228,7,1229,3
7,1229,7,1230,3
7,1230,8,1242,0
8,1242,8,1242,1
8,1242,9,1256,0
9,1256,9,1256,1
9,1256,10,1267,0
10,1267,10,1268,2
10,1268,10,1269,3
10,1269,11,1283,0
11,1283,11,1283,1
11,1283,12,1302,0
12,1302,12,1303,2
12,1303,12,1304,3
12,1304,13,1323,0
13,1323,13,1323,1
13,1323,14,1335,0
14,1335,14,1336,2
14,1336,14,1337,3
14,1337,15,1354,0
15,1354,15,1354,1
15,1354,16,1366,0
16,1366,16,1366,1
16,1366,17,1373,0
17,1373,17,1373,1
17,1373,18,1391,0
27:27
1,606,1,606,2
1,606,2,620,0
2,620,2,620,1
2,620,3,628,0
3,628,3,628,1
3,628,4,637,0
4,637,4,637,1
4,637,5,656,0
5,656,5,657,2
5,657,5,658,3
5,658,6,675,0
6,675,6,675,1
6,675,7,692,0
7,692,7,693,2
7,693,7,694,3
7,694,7,695,3
7,695,7,696,3
7,696,8,709,0
8,709,8,709,1
8,709,9,723,0
9,723,9,723,1
9,723,10,734,0
10,734,10,735,2
10,735,10,736,3
10,736,11,750,0
11,750,11,750,1
11,750,12,769,0
12,769,12,770,2
12,770,12,771,3
12,771,13,790,0
13,790,13,790,1
13,790,14,799,0
14,799,14,799,1
14,799,15,814,0
15,814,15,814,1
15,814,16,828,0
16,828,16,829,2
16,829,16,830,3
16,830,17,840,0
17,840,17,840,1
17,840,18,857,0
28:28
1,988,1,988,2
1,988,2,1002,0
2,1002,2,1002,1
2,1002,3,1010,0
3,1010,3,1010,1
3,1010,4,1019,0
4,1019,4,1019,1
4,1019,5,1039,0
5,1039,5,1040,2
5,1040,5,1041,3
5,1041,5,1042,3
5,1042,6,1059,0
6,1059,6,1059,1
6,1059,7,1076,0
7,1076,7,1077,2
7,1077,7,1078,3
7,1078,7,1079,3
7,1079,7,1080,3
7,1080,8,1092,0
8,1092,8,1092,1
8,1092,9,1109,0
9,1109,9,1110,2
9,1110,9,1111,3
9,1111,10,1121,0
10,1121,10,1121,1
10,1121,11,1136,0
11,1136,11,1137,2
11,1137,11,1138,3
11,1138,12,1156,0
12,1156,12,1156,1
12,1156,13,1173,0
13,1173,13,1173,1
13,1173,14,1185,0
14,1185,14,1186,2
14,1186,14,1187,3
14,1187,14,1188,3
14,1188,15,1205,0
15,1205,15,1205,1
15,1205,16,1217,0
16,1217,16,1217,1
16,1217,17,1224,0
17,1224,17,1224,1
17,1224,18,1242,0
29:29
1,815,1,815,2
1,815,2,829,0
2,829,2,829,1
2,829,3,840,0
3,840,3,841,2
3,841,3,842,3
3,842,4,853,0
4,853,4,853,1
4,853,5,872,0
5,872,5,873,2
5,873,5,874,3
5,874,5,875,3
5,875,5,876,3
5,876,5,877,3
5,877,5,878,3
5,878,5,879,3
5,879,5,880,3
5,880,5,881,3
5,881,6,898,0
6,898,6,898,1
6,898,7,915,0
30:30
1,680,1,680,2
1,680,2,694,0
2,694,2,694,1
2,694,3,702,0
3,702,3,702,1
3,702,4,714,0
4,714,4,715,2
4,715,4,716,3
4,716,5,737,0
5,737,5,738,2
5,738,5,739,3
5,739,6,756,0
6,756,6,756,1
6,756,7,773,0
31:31
1,1001,1,1001,2
1,1001,2,1014,0
2,1014,2,1014,1
2,1014,3,1022,0
3,1022,3,1022,1
3,1022,4,1031,0
4,1031,4,1031,1
4,1031,5,1050,0
5,1050,5,1051,2
5,1051,5,1052,3
5,1052,6,1069,0
6,1069,6,1069,1
6,1069,7,1086,0
7,1086,7,1087,2
7,1087,7,1088,3
7,1088,7,1089,3
7,1089,7,1090,3
7,1090,7,1091,3
7,1091,8,1103,0
8,1103,8,1103,1
8,1103,9,1117,0
9,1117,9,1117,1
9,1117,10,1128,0
10,1128,10,1129,2
10,1129,10,1130,3
10,1130,11,1144,0
11,1144,11,1144,1
11,1144,12,1163,0
12,1163,12,1164,2
12,1164,12,1165,3
12,1165,13,1184,0
13,1184,13,1184,1
13,1184,14,1196,0
14,1196,14,1197,2
14,1197,14,1198,3
14,1198,15,1215,0
15,1215,15,1215,1
15,1215,16,1227,0
16,1227,16,1227,1
16,1227,17,1234,0
17,1234,17,1234,1
17,1234,18,1252,0
32:32
1,771,1,771,2
1,771,2,785,0
2,785,2,785,1
2,785,3,793,0
3,793,3,793,1
3,793,4,802,0
4,802,4,802,1
4,802,5,821,0
5,821,5,822,2
5,822,5,823,3
5,823,6,840,0
6,840,6,840,1
6,840,7,857,0
7,857,7,858,2
7,858,7,859,3
7,859,7,860,3
7,860,8,872,0
8,872,8,872,1
8,872,9,886,0
9,886,9,886,1
9,886,10,894,0
10,894,10,894,1
10,894,11,906,0
11,906,11,906,1
11,906,12,925,0
12,925,12,926,2
12,926,12,927,3
12,927,13,946,0
13,946,13,946,1
13,946,14,958,0
14,958,14,959,2
14,959,14,960,3
14,960,15,977,0
15,977,15,977,1
15,977,16,989,0
16,989,16,989,1
16,989,17,996,0
17,996,17,996,1
17,996,18,1013,0
18,1013,18,1014,2
33:33
1,932,1,932,2
1,932,2,946,0
2,946,2,946,1
2,946,3,956,0
3,956,3,957,2
3,957,3,958,3
3,958,4,969,0
4,969,4,969,1
4,969,5,986,0
5,986,5,986,1
5,986,6,1000,0
6,1000,6,1000,1
6,1000,7,1017,0
7,1017,7,1018,2
7,1018,7,1019,3
7,1019,7,1020,3
7,1020,8,1032,0
8,1032,8,1032,1
8,1032,9,1046,0
9,1046,9,1046,1
9,1046,10,1055,0
10,1055,10,1055,1
10,1055,11,1066,0
11,1066,11,1066,1
11,1066,12,1085,0
12,1085,12,1086,2
12,1086,12,1087,3
12,1087,13,1107,0
13,1107,13,1107,1
13,1107,14,1119,0
14,1119,14,1120,2
14,1120,14,1121,3
14,1121,15,1137,0
15,1137,15,1137,1
15,1137,16,1149,0
16,1149,16,1149,1
16,1149,17,1157,0
17,1157,17,1157,1
17,1157,18,1175,0
18,1175,18,1176,2
34:34
1,1044,1,1044,2
1,1044,2,1058,0
2,1058,2,1058,1
2,1058,3,1069,0
3,1069,3,1070,2
3,1070,3,1071,3
3,1071,4,1082,0
4,1082,4,1082,1
4,1082,5,1100,0
5,1100,5,1100,1
5,1100,6,1115,0
6,1115,6,1115,1
6,1115,7,1132,0
7,1132,7,1133,2
7,1133,7,1134,3
7,1134,8,1150,0
8,1150,8,1151,2
8,1151,8,1152,3
8,1152,9,1168,0
9,1168,9,1168,1
9,1168,10,1176,0
10,1176,10,1176,1
10,1176,11,1188,0
11,1188,11,1188,1
11,1188,12,1207,0
12,1207,12,1208,2
12,1208,12,1209,3
12,1209,13,1228,0
13,1228,13,1228,1
13,1228,14,1240,0
14,1240,14,1241,2
14,1241,14,1242,3
14,1242,15,1259,0
15,1259,15,1259,1
15,1259,16,1270,0
16,1270,16,1270,1
16,1270,17,1278,0
17,1278,17,1278,1
17,1278,18,1296,0
18,1296,18,1297,2
35:35
1,969,1,969,2
1,969,2,983,0
2,983,2,983,1
2,983,3,991,0
3,991,3,991,1
3,991,4,1003,0
4,1003,4,1004,2
4,1004,4,1005,3
4,1005,5,1023,0
5,1023,5,1023,1
5,1023,6,1038,0
6,1038,6,1038,1
6,1038,7,1055,0
7,1055,7,1056,2
7,1056,7,1057,3
7,1057,7,1058,3
7,1058,7,1059,3
7,1059,7,1060,3
7,1060,8,1072,0
8,1072,8,1072,1
8,1072,9,1086,0
9,1086,9,1086,1
9,1086,10,1097,0
10,1097,10,1098,2
10,1098,10,1099,3
10,1099,11,1113,0
11,1113,11,1113,1
11,1113,12,1132,0
12,1132,12,1133,2
12,1133,12,1134,3
12,1134,13,1153,0
13,1153,13,1153,1
13,1153,14,1165,0
14,1165,14,1166,2
14,1166,14,1167,3
14,1167,15,1184,0
15,1184,15,1184,1
15,1184,16,1196,0
16,1196,16,1196,1
16,1196,17,1203,0
17,1203,17,1203,1
17,1203,18,1221,0
36:36
1,1030,1,1030,2
1,1030,2,1044,0
2,1044,2,1044,1
2,1044,3,1052,0
3,1052,3,1052,1
3,1052,4,1061,0
4,1061,4,1061,1
4,1061,5,1080,0
5,1080,5,1081,2
5,1081,5,1082,3
5,1082,5,1083,3
5,1083,5,1084,3
5,1084,6,1101,0
6,1101,6,1101,1
6,1101,7,1118,0
7,1118,7,1119,2
7,1119,7,1120,3
7,1120,7,1121,3
7,1121,7,1122,3
7,1122,7,1123,3
7,1123,7,1124,3
7,1124,7,1125,3
7,1125,8,1137,0
8,1137,8,1137,1
8,1137,9,1151,0
9,1151,9,1151,1
9,1151,10,1159,0
10,1159,10,1159,1
10,1159,11,1174,0
11,1174,11,1175,2
11,1175,11,1176,3
11,1176,12,1194,0
12,1194,12,1194,1
12,1194,13,1211,0
13,1211,13,1211,1
13,1211,14,1223,0
14,1223,14,1224,2
14,1224,14,1225,3
14,1225,15,1242,0
15,1242,15,1242,1
15,1242,16,1254,0
16,1254,16,1254,1
16,1254,17,1261,0
17,1261,17,1261,1
17,1261,18,1279,0
37:37
1,1067,1,1067,2
1,1067,2,1081,0
2,1081,2,1081,1
2,1081,3,1089,0
3,1089,3,1089,1
3,1089,4,1101,0
4,1101,4,1102,2
4,1102,4,1103,3
4,1103,5,1121,0
5,1121,5,1121,1
5,1121,6,1139,0
6,1139,6,1140,2
6,1140,6,1141,3
6,1141,7,1160,0
7,1160,7,1161,2
7,1161,7,1162,3
7,1162,7,1163,3
7,1163,8,1175,0
8,1175,8,1175,1
8,1175,9,1189,0
9,1189,9,1189,1
9,1189,10,1197,0
10,1197,10,1197,1
10,1197,11,1212,0
11,1212,11,1213,2
11,1213,11,1214,3
11,1214,12,1232,0
12,1232,12,1232,1
12,1232,13,1249,0
13,1249,13,1249,1
13,1249,14,1261,0
14,1261,14,1262,2
14,1262,14,1263,3
14,1263,15,1280,0
15,1280,15,1280,1
15,1280,16,1292,0
16,1292,16,1292,1
16,1292,17,1302,0
17,1302,17,1303,2
17,1303,17,1304,3
17,1304,18,1324,0
38:38
1,1126,1,1126,2
1,1126,2,1140,0
2,1140,2,1140,1
2,1140,3,1147,0
3,1147,3,1147,1
3,1147,4,1156,0
4,1156,4,1156,1
4,1156,5,1176,0
5,1176,5,1177,2
5,1177,5,1178,3
5,1178,5,1179,3
5,1179,5,1180,3
5,1180,6,1197,0
6,1197,6,1197,1
6,1197,7,1214,0
7,1214,7,1215,2
7,1215,7,1216,3
7,1216,7,1217,3
7,1217,8,1232,0
8,1232,8,1233,2
8,1233,8,1234,3
8,1234,9,1250,0
9,1250,9,1250,1
9,1250,10,1258,0
10,1258,10,1258,1
10,1258,11,1273,0
11,1273,11,1274,2
11,1274,11,1275,3
11,1275,12,1296,0
12,1296,12,1297,2
12,1297,12,1298,3
12,1298,13,1317,0
13,1317,13,1317,1
13,1317,14,1326,0
14,1326,14,1326,1
14,1326,15,1341,0
15,1341,15,1341,1
15,1341,16,1353,0
16,1353,16,1353,1
16,1353,17,1360,0
17,1360,17,1360,1
17,1360,18,1378,0
39:39
1,695,1,695,2
1,695,2,709,0
2,709,2,709,1
2,709,3,717,0
3,717,3,717,1
3,717,4,726,0
4,726,4,726,1
4,726,5,745,0
5,745,5,746,2
5,746,5,747,3
5,747,6,767,0
6,767,6,768,2
6,768,6,769,3
6,769,7,788,0
7,788,7,789,2
7,789,7,790,3
7,790,7,791,3
7,791,8,803,0
8,803,8,803,1
8,803,9,817,0
9,817,9,817,1
9,817,10,828,0
10,828,10,829,2
10,829,10,830,3
10,830,11,844,0
11,844,11,844,1
11,844,12,863,0
12,863,12,864,2
12,864,12,865,3
12,865,13,884,0
13,884,13,884,1
13,884,14,893,0
14,893,14,893,1
14,893,15,908,0
15,908,15,908,1
15,908,16,923,0
16,923,16,924,2
16,924,16,925,3
16,925,17,934,0
17,934,17,934,1
17,934,18,952,0
40:40
1,1223,1,1223,2
1,1223,2,1236,0
2,1236,2,1236,1
2,1236,3,1247,0
3,1247,3,1248,2
3,1248,3,1249,3
3,1249,4,1260,0
4,1260,4,1260,1
4,1260,5,1280,0
5,1280,5,1281,2
5,1281,5,1282,3
5,1282,6,1301,0
6,1301,6,1302,2
6,1302,6,1303,3
6,1303,7,1322,0
41:41
1,445,2,459,0
2,459,2,459,1
2,459,3,470,0
3,470,3,471,2
3,471,3,472,3
3,472,4,483,0
4,483,4,483,1
4,483,5,499,0
5,499,5,499,1
5,499,6,514,0
6,514,6,514,1
6,514,7,531,0
7,531,7,532,2
7,532,7,533,3
7,533,7,534,3
7,534,7,535,3
7,535,8,550,0
8,550,8,551,2
8,551,8,552,3
8,552,9,568,0
9,568,9,568,1
9,568,10,576,0
10,576,10,576,1
10,576,11,588,0
11,588,11,588,1
11,588,12,607,0
12,607,12,608,2
12,608,12,609,3
12,609,13,628,0
13,628,13,628,1
13,628,14,640,0
14,640,14,641,2
14,641,14,642,3
14,642,15,659,0
15,659,15,659,1
15,659,16,671,0
16,671,16,671,1
16,671,17,678,0
17,678,17,678,1
17,678,18,695,0
18,695,18,696,2
42:42
1,570,2,584,0
2,584,2,584,1
2,584,3,595,0
3,595,3,596,2
3,596,3,597,3
3,597,4,608,0
4,608,4,608,1
4,608,5,627,0
5,627,5,628,2
5,628,5,629,3
5,629,6,646,0
6,646,6,646,1
6,646,7,663,0
7,663,7,664,2
7,664,7,665,3
7,665,7,666,3
7,666,7,667,3
7,667,7,668,3
7,668,7,669,3
7,669,7,670,3
7,670,7,671,3
7,671,8,683,0
8,683,8,683,1
8,683,9,697,0
9,697,9,697,1
9,697,10,708,0
10,708,10,709,2
10,709,10,710,3
10,710,11,724,0
11,724,11,724,1
11,724,12,743,0
12,743,12,744,2
12,744,12,745,3
12,745,12,746,3
12,746,12,747,3
12,747,12,748,3
12,748,12,749,3
12,749,12,750,3
12,750,12,751,3
12,751,12,752,3
12,752,13,771,0
13,771,13,771,1
13,771,14,780,0
14,780,14,780,1
14,780,15,798,0
15,798,15,799,2
15,799,15,800,3
15,800,16,814,0
16,814,16,814,1
16,814,17,821,0
17,821,17,821,1
17,821,18,839,0
18,839,18,840,2
43:43
1,653,2,667,0
2,667,2,667,1
2,667,3,675,0
3,675,3,675,1
3,675,4,687,0
4,687,4,688,2
4,688,4,689,3
4,689,5,707,0
5,707,5,707,1
5,707,6,725,0
6,725,6,726,2
6,726,6,727,3
6,727,7,746,0
7,746,7,747,2
7,747,7,748,3
7,748,7,749,3
7,749,7,750,3
7,750,7,751,3
7,751,8,763,0
8,763,8,763,1
8,763,9,778,0
9,778,9,778,1
9,778,10,786,0
10,786,10,786,1
10,786,11,801,0
11,801,11,802,2
11,802,11,803,3
11,803,12,821,0
12,821,12,821,1
12,821,13,838,0
13,838,13,838,1
13,838,14,850,0
14,850,14,851,2
14,851,14,852,3
14,852,15,869,0
15,869,15,869,1
15,869,16,881,0
16,881,16,881,1
16,881,17,891,0
17,891,17,892,2
17,892,17,893,3
17,893,18,914,0
18,914,18,915,2
44:44
1,728,2,742,0
2,742,2,742,1
2,742,3,753,0
3,753,3,754,2
3,754,3,755,3
3,755,4,766,0
4,766,4,766,1
4,766,5,785,0
5,785,5,786,2
5,786,5,787,3
5,787,6,804,0
6,804,6,804,1
6,804,7,821,0
7,821,7,822,2
7,822,7,823,3
7,823,7,824,3
7,824,8,836,0
8,836,8,836,1
8,836,9,853,0
9,853,9,854,2
9,854,9,855,3
9,855,10,865,0
10,865,10,865,1
10,865,11,877,0
11,877,11,877,1
11,877,12,896,0
12,896,12,897,2
12,897,12,898,3
12,898,13,917,0
13,917,13,917,1
13,917,14,926,0
14,926,14,926,1
14,926,15,941,0
15,941,15,941,1
15,941,16,956,0
16,956,16,957,2
16,957,16,958,3
16,958,17,967,0
17,967,17,967,1
17,967,18,985,0
18,985,18,986,2
45:45
1,822,2,836,0
2,836,2,836,1
2,836,3,847,0
3,847,3,848,2
3,848,3,849,3
3,849,3,850,3
3,850,3,851,3
3,851,3,852,3
3,852,3,853,3
3,853,3,854,3
3,854,3,855,3
3,855,3,856,3
3,856,4,867,0
4,867,4,867,1
4,867,5,886,0
5,886,5,887,2
5,887,5,888,3
5,888,6,905,0
6,905,6,905,1
6,905,7,922,0
7,922,7,923,2
7,923,7,924,3
7,924,7,925,3
7,925,8,938,0
8,938,8,938,1
8,938,9,955,0
9,955,9,956,2
9,956,9,957,3
9,957,10,967,0
10,967,10,967,1
10,967,11,982,0
11,982,11,983,2
11,983,11,984,3
11,984,11,985,3
11,985,11,986,3
11,986,11,987,3
11,987,11,988,3
11,988,11,989,3
11,989,11,990,3
11,990,12,1008,0
12,1008,12,1008,1
12,1008,13,1025,0
13,1025,13,1025,1
13,1025,14,1037,0
14,1037,14,1038,2
14,1038,14,1039,3
14,1039,15,1056,0
15,1056,15,1056,1
15,1056,16,1068,0
16,1068,16,1068,1
16,1068,17,1075,0
17,1075,17,1075,1
17,1075,18,1093,0
18,1093,18,1094,2
46:46
1,877,2,891,0
2,891,2,891,1
2,891,3,899,0
3,899,3,899,1
3,899,4,908,0
4,908,4,908,1
4,908,5,927,0
5,927,5,928,2
5,928,5,929,3
5,929,6,946,0
6,946,6,946,1
6,946,7,963,0
7,963,7,964,2
7,964,7,965,3
7,965,7,966,3
7,966,8,978,0
8,978,8,978,1
8,978,9,995,0
9,995,9,996,2
9,996,9,997,3
9,997,10,1007,0
10,1007,10,1007,1
10,1007,11,1022,0
11,1022,11,1023,2
11,1023,11,1024,3
11,1024,12,1042,0
12,1042,12,1042,1
12,1042,13,1059,0
13,1059,13,1059,1
13,1059,14,1071,0
14,1071,14,1072,2
14,1072,14,1073,3
14,1073,15,1090,0
15,1090,15,1090,1
15,1090,16,1102,0
16,1102,16,1102,1
16,1102,17,1109,0
17,1109,17,1109,1
17,1109,18,1127,0
18,1127,18,1128,2
47:47
1,936,2,950,0
2,950,2,950,1
2,950,3,961,0
3,961,3,962,2
3,962,3,963,3
3,963,4,974,0
4,974,4,974,1
4,974,5,990,0
5,990,5,990,1
5,990,6,1008,0
6,1008,6,1009,2
6,1009,6,1010,3
6,1010,7,1029,0
7,1029,7,1030,2
7,1030,7,1031,3
7,1031,7,1032,3
7,1032,8,1044,0
8,1044,8,1044,1
8,1044,9,1061,0
9,1061,9,1062,2
9,1062,9,1063,3
9,1063,10,1073,0
10,1073,10,1073,1
10,1073,11,1085,0
11,1085,11,1085,1
11,1085,12,1104,0
12,1104,12,1105,2
12,1105,12,1106,3
12,1106,13,1125,0
13,1125,13,1125,1
13,1125,14,1134,0
14,1134,14,1134,1
14,1134,15,1152,0
15,1152,15,1153,2
15,1153,15,1154,3
15,1154,16,1168,0
16,1168,16,1168,1
16,1168,17,1175,0
17,1175,17,1175,1
17,1175,18,1193,0
18,1193,18,1194,2
48:48
1,1018,2,1032,0
2,1032,2,1032,1
2,1032,3,1043,0
3,1043,3,1044,2
3,1044,3,1045,3
3,1045,4,1056,0
4,1056,4,1056,1
4,1056,5,1075,0
5,1075,5,1076,2
5,1076,5,1077,3
5,1077,6,1094,0
6,1094,6,1094,1
6,1094,7,1111,0
7,1111,7,1112,2
7,1112,7,1113,3
7,1113,7,1114,3
7,1114,8,1129,0
8,1129,8,1130,2
8,1130,8,1131,3
8,1131,9,1147,0
9,1147,9,1147,1
9,1147,10,1155,0
10,1155,10,1155,1
10,1155,11,1167,0
11,1167,11,1167,1
11,1167,12,1186,0
12,1186,12,1187,2
12,1187,12,1188,3
12,1188,13,1207,0
13,1207,13,1207,1
13,1207,14,1216,0
14,1216,14,1216,1
14,1216,15,1231,0
15,1231,15,1231,1
15,1231,16,1246,0
16,1246,16,1247,2
16,1247,16,1248,3
16,1248,17,1257,0
17,1257,17,1257,1
17,1257,18,1275,0
18,1275,18,1276,2
49:49
1,702,1,702,2
1,702,2,716,0
2,716,2,716,1
2,716,3,727,0
3,727,3,728,2
3,728,3,729,3
3,729,4,743,0
4,743,4,744,2
4,744,4,745,3
4,745,5,763,0
5,763,5,763,1
5,763,6,778,0
6,778,6,778,1
6,778,7,795,0
7,795,7,796,2
7,796,7,797,3
7,797,7,798,3
7,798,8,813,0
8,813,8,814,2
8,814,8,815,3
8,815,9,831,0
9,831,9,831,1
9,831,10,839,0
10,839,10,839,1
10,839,11,851,0
11,851,11,851,1
11,851,12,870,0
12,870,12,871,2
12,871,12,872,3
12,872,13,891,0
13,891,13,891,1
13,891,14,903,0
14,903,14,904,2
14,904,14,905,3
14,905,15,925,0
15,925,15,926,2
15,926,15,927,3
15,927,16,941,0
16,941,16,941,1
16,941,17,948,0
17,948,17,948,1
17,948,18,966,0
18,966,18,967,2
50:50
1,390,2,404,0
2,404,2,404,1
2,404,3,412,0
3,412,3,412,1
3,412,4,421,0
4,421,4,421,1
4,421,5,440,0
5,440,5,441,2
5,441,5,442,3
5,442,6,459,0
6,459,6,459,1
6,459,7,476,0
7,476,7,477,2
7,477,7,478,3
7,478,7,479,3
7,479,7,480,3
7,480,7,481,3
7,481,8,496,0
8,496,8,497,2
8,497,8,498,3
8,498,9,514,0
9,514,9,514,1
9,514,10,522,0
10,522,10,522,1
10,522,11,537,0
11,537,11,538,2
11,538,11,539,3
11,539,12,560,0
12,560,12,561,2
12,561,12,562,3
12,562,13,581,0
13,581,13,581,1
13,581,14,593,0
14,593,14,594,2
14,594,14,595,3
14,595,15,612,0
15,612,15,612,1
15,612,16,624,0
16,624,16,624,1
16,624,17,631,0
17,631,17,631,1
17,631,18,649,0
51:51
1,405,2,419,0
2,419,2,419,1
2,419,3,427,0
3,427,3,427,1
3,427,4,439,0
4,439,4,440,2
4,440,4,441,3
4,441,5,459,0
5,459,5,459,1
5,459,6,477,0
6,477,6,478,2
6,478,6,479,3
6,479,7,498,0
7,498,7,499,2
7,499,7,500,3
7,500,7,501,3
7,501,7,502,3
7,502,7,503,3
7,503,7,504,3
7,504,8,516,0
8,516,8,516,1
8,516,9,533,0
9,533,9,534,2
9,534,9,535,3
9,535,10,548,0
10,548,10,549,2
10,549,10,550,3
10,550,11,564,0
11,564,11,564,1
11,564,12,583,0
12,583,12,584,2
12,584,12,585,3
12,585,13,604,0
13,604,13,604,1
13,604,14,616,0
14,616,14,617,2
14,617,14,618,3
14,618,15,635,0
15,635,15,635,1
15,635,16,647,0
16,647,16,647,1
16,647,17,654,0
17,654,17,654,1
17,654,18,672,0
52:52
1,420,2,434,0
2,434,2,434,1
2,434,3,445,0
3,445,3,446,2
3,446,3,447,3
3,447,4,458,0
4,458,4,458,1
4,458,5,477,0
5,477,5,478,2
5,478,5,479,3
5,479,6,496,0
6,496,6,496,1
6,496,7,513,0
7,513,7,514,2
7,514,7,515,3
7,515,7,516,3
7,516,8,531,0
8,531,8,532,2
8,532,8,533,3
8,533,9,549,0
9,549,9,549,1
9,549,10,560,0
10,560,10,561,2
10,561,10,562,3
10,562,11,579,0
11,579,11,580,2
11,580,11,581,3
11,581,12,599,0
12,599,12,599,1
12,599,13,616,0
13,616,13,616,1
13,616,14,625,0
14,625,14,625,1
14,625,15,640,0
15,640,15,640,1
15,640,16,655,0
16,655,16,656,2
16,656,16,657,3
16,657,17,666,0
17,666,17,666,1
17,666,18,684,0
53:53
1,462,2,476,0
2,476,2,476,1
2,476,3,484,0
3,484,3,484,1
3,484,4,493,0
4,493,4,493,1
4,493,5,512,0
5,512,5,513,2
5,513,5,514,3
5,514,5,515,3
5,515,6,532,0
6,532,6,532,1
6,532,7,549,0
7,549,7,550,2
7,550,7,551,3
7,551,7,552,3
7,552,7,553,3
7,553,7,554,3
7,554,8,566,0
8,566,8,566,1
8,566,9,580,0
9,580,9,580,1
9,580,10,591,0
10,591,10,592,2
10,592,10,593,3
10,593,11,607,0
11,607,11,607,1
11,607,12,626,0
12,626,12,627,2
12,627,12,628,3
12,628,13,647,0
13,647,13,647,1
13,647,14,656,0
14,656,14,656,1
14,656,15,671,0
15,671,15,671,1
15,671,16,683,0
16,683,16,683,1
16,683,17,693,0
17,693,17,694,2
17,694,17,695,3
17,695,18,715,0
54:54
1,476,2,490,0
2,490,2,490,1
2,490,3,501,0
3,501,3,502,2
3,502,3,503,3
3,503,4,514,0
4,514,4,514,1
4,514,5,530,0
5,530,5,530,1
5,530,6,545,0
6,545,6,545,1
6,545,7,562,0
7,562,7,563,2
7,563,7,564,3
7,564,7,565,3
7,565,8,577,0
8,577,8,577,1
8,577,9,591,0
9,591,9,591,1
9,591,10,602,0
10,602,10,603,2
10,603,10,604,3
10,604,10,605,3
10,605,11,619,0
11,619,11,619,1
11,619,12,636,0
12,636,12,636,1
12,636,13,653,0
13,653,13,653,1
13,653,14,665,0
14,665,14,666,2
14,666,14,667,3
14,667,15,684,0
15,684,15,684,1
15,684,16,696,0
16,696,16,696,1
16,696,17,703,0
17,703,17,703,1
17,703,18,721,0
18,721,18,722,2
55:55
1,494,2,508,0
2,508,2,508,1
2,508,3,516,0
3,516,3,516,1
3,516,4,528,0
4,528,4,529,2
4,529,4,530,3
4,530,5,551,0
5,551,5,552,2
5,552,5,553,3
5,553,6,570,0
6,570,6,570,1
6,570,7,587,0
7,587,7,588,2
7,588,7,589,3
7,589,7,590,3
7,590,8,602,0
8,602,8,602,1
8,602,9,616,0
9,616,9,616,1
9,616,10,627,0
10,627,10,628,2
10,628,10,629,3
10,629,11,643,0
11,643,11,643,1
11,643,12,659,0
12,659,12,659,1
12,659,13,676,0
13,676,13,676,1
13,676,14,688,0
14,688,14,689,2
14,689,14,690,3
14,690,15,707,0
15,707,15,707,1
15,707,16,722,0
16,722,16,723,2
16,723,16,724,3
16,724,17,733,0
17,733,17,733,1
17,733,18,751,0
18,751,18,752,2
56:56
1,505,2,519,0
2,519,2,519,1
2,519,3,530,0
3,530,3,531,2
3,531,3,532,3
3,532,4,543,0
4,543,4,543,1
4,543,5,559,0
5,559,5,559,1
5,559,6,577,0
6,577,6,578,2
6,578,6,579,3
6,579,7,598,0
7,598,7,599,2
7,599,7,600,3
7,600,7,601,3
7,601,8,613,0
8,613,8,613,1
8,613,9,627,0
9,627,9,627,1
9,627,10,638,0
10,638,10,639,2
10,639,10,640,3
10,640,11,654,0
11,654,11,654,1
11,654,12,673,0
12,673,12,674,2
12,674,12,675,3
12,675,13,694,0
13,694,13,694,1
13,694,14,703,0
14,703,14,703,1
14,703,15,721,0
15,721,15,722,2
15,722,15,723,3
15,723,15,724,3
15,724,15,725,3
15,725,15,726,3
15,726,15,727,3
15,727,16,741,0
16,741,16,741,1
16,741,17,748,0
17,748,17,748,1
17,748,18,766,0
57:57
1,518,2,532,0
2,532,2,532,1
2,532,3,540,0
3,540,3,540,1
3,540,4,552,0
4,552,4,553,2
4,553,4,554,3
4,554,5,575,0
5,575,5,576,2
5,576,5,577,3
5,577,6,594,0
6,594,6,594,1
6,594,7,611,0
7,611,7,612,2
7,612,7,613,3
7,613,7,614,3
7,614,7,615,3
7,615,8,630,0
8,630,8,631,2
8,631,8,632,3
8,632,8,633,3
8,633,8,634,3
8,634,8,635,3
8,635,8,636,3
8,636,9,652,0
9,652,9,652,1
9,652,10,663,0
10,663,10,664,2
10,664,10,665,3
10,665,11,679,0
11,679,11,679,1
11,679,12,698,0
12,698,12,699,2
12,699,12,700,3
12,700,13,719,0
13,719,13,719,1
13,719,14,728,0
14,728,14,728,1
14,728,15,743,0
15,743,15,743,1
15,743,16,755,0
16,755,16,755,1
16,755,17,765,0
17,765,17,766,2
17,766,17,767,3
17,767,18,788,0
58:58
1,533,2,547,0
2,547,2,547,1
2,547,3,558,0
3,558,3,559,2
3,559,3,560,3
3,560,3,561,3
3,561,3,562,3
3,562,3,563,3
3,563,3,564,3
3,564,4,575,0
4,575,4,575,1
4,575,5,591,0
5,591,5,591,1
5,591,6,609,0
6,609,6,610,2
6,610,6,611,3
6,611,7,630,0
7,630,7,631,2
7,631,7,632,3
7,632,7,633,3
7,633,7,634,3
7,634,7,635,3
7,635,8,647,0
8,647,8,647,1
8,647,9,664,0
9,664,9,665,2
9,665,9,666,3
9,666,10,676,0
10,676,10,676,1
10,676,11,688,0
11,688,11,688,1
11,688,12,707,0
12,707,12,708,2
12,708,12,709,3
12,709,12,710,3
12,710,13,729,0
13,729,13,729,1
13,729,14,741,0
14,741,14,742,2
14,742,14,743,3
14,743,14,744,3
14,744,15,761,0
15,761,15,761,1
15,761,16,773,0
16,773,16,773,1
16,773,17,781,0
17,781,17,781,1
17,781,18,798,0
59:59
1,555,2,569,0
2,569,2,569,1
2,569,3,577,0
3,577,3,577,1
3,577,4,589,0
4,589,4,590,2
4,590,4,591,3
4,591,5,609,0
5,609,5,609,1
5,609,6,624,0
6,624,6,624,1
6,624,7,641,0
7,641,7,642,2
7,642,7,643,3
7,643,7,644,3
7,644,8,659,0
8,659,8,660,2
8,660,8,661,3
8,661,9,677,0
9,677,9,677,1
9,677,10,685,0
10,685,10,685,1
10,685,11,700,0
11,700,11,701,2
11,701,11,702,3
11,702,12,720,0
12,720,12,720,1
12,720,13,737,0
13,737,13,737,1
13,737,14,749,0
14,749,14,750,2
14,750,14,751,3
14,751,15,768,0
15,768,15,768,1
15,768,16,783,0
16,783,16,784,2
16,784,16,785,3
16,785,17,794,0
17,794,17,794,1
17,794,18,812,0
60:60
1,584,2,598,0
2,598,2,598,1
2,598,3,606,0
3,606,3,606,1
3,606,4,618,0
4,618,4,619,2
4,619,4,620,3
4,620,5,638,0
5,638,5,638,1
5,638,6,656,0
6,656,6,657,2
6,657,6,658,3
6,658,6,659,3
6,659,6,660,3
6,660,6,661,3
6,661,6,662,3
6,662,6,663,3
6,663,7,682,0
7,682,7,683,2
7,683,7,684,3
7,684,7,685,3
7,685,8,698,0
8,698,8,698,1
8,698,9,715,0
9,715,9,716,2
9,716,9,717,3
9,717,10,727,0
10,727,10,727,1
10,727,11,739,0
11,739,11,739,1
11,739,12,758,0
12,758,12,759,2
12,759,12,760,3
12,760,13,779,0
13,779,13,779,1
13,779,14,791,0
14,791,14,792,2
14,792,14,793,3
14,793,15,810,0
15,810,15,810,1
15,810,16,821,0
16,821,16,821,1
16,821,17,829,0
17,829,17,829,1
17,829,18,847,0
61:61
1,618,2,632,0
2,632,2,632,1
2,632,3,643,0
3,643,3,644,2
3,644,3,645,3
3,645,4,656,0
4,656,4,656,1
4,656,5,675,0
5,675,5,676,2
5,676,5,677,3
5,677,6,697,0
6,697,6,698,2
6,698,6,699,3
6,699,7,718,0
7,718,7,719,2
7,719,7,720,3
7,720,7,721,3
7,721,8,736,0
8,736,8,737,2
8,737,8,738,3
8,738,9,754,0
9,754,9,754,1
9,754,10,762,0
10,762,10,762,1
10,762,11,774,0
11,774,11,774,1
11,774,12,793,0
12,793,12,794,2
12,794,12,795,3
12,795,12,796,3
12,796,13,815,0
13,815,13,815,1
13,815,14,824,0
14,824,14,824,1
14,824,15,839,0
15,839,15,839,1
15,839,16,851,0
16,851,16,851,1
16,851,17,861,0
17,861,17,862,2
17,862,17,863,3
17,863,18,883,0
62:62
1,660,2,674,0
2,674,2,674,1
2,674,3,685,0
3,685,3,686,2
3,686,3,687,3
3,687,4,698,0
4,698,4,698,1
4,698,5,717,0
5,717,5,718,2
5,718,5,719,3
5,719,6,736,0
6,736,6,736,1
6,736,7,753,0
7,753,7,754,2
7,754,7,755,3
7,755,7,756,3
7,756,8,771,0
8,771,8,772,2
8,772,8,773,3
8,773,9,789,0
9,789,9,789,1
9,789,10,797,0
10,797,10,797,1
10,797,11,809,0
11,809,11,809,1
11,809,12,828,0
12,828,12,829,2
12,829,12,830,3
12,830,13,849,0
13,849,13,849,1
13,849,14,858,0
14,858,14,858,1
14,858,15,876,0
15,876,15,877,2
15,877,15,878,3
15,878,15,879,3
15,879,16,893,0
16,893,16,893,1
16,893,17,900,0
17,900,17,900,1
17,900,18,919,0
63:63
1,669,2,683,0
2,683,2,683,1
2,683,3,694,0
3,694,3,695,2
3,695,3,696,3
3,696,4,707,0
4,707,4,707,1
4,707,5,727,0
5,727,5,728,2
5,728,5,729,3
5,729,5,730,3
5,730,5,731,3
5,731,6,748,0
6,748,6,748,1
6,748,7,766,0
7,766,7,767,2
7,767,7,768,3
7,768,7,769,3
7,769,8,781,0
8,781,8,781,1
8,781,9,795,0
9,795,9,795,1
9,795,10,806,0
10,806,10,807,2
10,807,10,808,3
10,808,11,822,0
11,822,11,822,1
11,822,12,841,0
12,841,12,842,2
12,842,12,843,3
12,843,13,862,0
13,862,13,862,1
13,862,14,871,0
14,871,14,871,1
14,871,15,886,0
15,886,15,886,1
15,886,16,901,0
16,901,16,902,2
16,902,16,903,3
16,903,17,912,0
17,912,17,912,1
17,912,18,930,0
64:64
1,721,2,735,0
2,735,2,735,1
2,735,3,743,0
3,743,3,743,1
3,743,4,752,0
4,752,4,752,1
4,752,5,771,0
5,771,5,772,2
5,772,5,773,3
5,773,5,774,3
5,774,6,791,0
6,791,6,791,1
6,791,7,808,0
7,808,7,809,2
7,809,7,810,3
7,810,7,811,3
7,811,8,823,0
8,823,8,823,1
8,823,9,837,0
9,837,9,837,1
9,837,10,848,0
10,848,10,849,2
10,849,10,850,3
10,850,11,867,0
11,867,11,868,2
11,868,11,869,3
11,869,12,887,0
12,887,12,887,1
12,887,13,904,0
13,904,13,904,1
13,904,14,916,0
14,916,14,917,2
14,917,14,918,3
14,918,15,935,0
15,935,15,935,1
15,935,16,947,0
16,947,16,947,1
16,947,17,957,0
17,957,17,958,2
17,958,17,959,3
17,959,18,979,0
65:65
1,745,2,759,0
2,759,2,759,1
2,759,3,770,0
3,770,3,771,2
3,771,3,772,3
3,772,4,783,0
4,783,4,783,1
4,783,5,802,0
5,802,5,803,2
5,803,5,804,3
5,804,6,821,0
6,821,6,821,1
6,821,7,838,0
7,838,7,839,2
7,839,7,840,3
7,840,7,841,3
7,841,8,856,0
8,856,8,857,2
8,857,8,858,3
8,858,9,874,0
9,874,9,874,1
9,874,10,885,0
10,885,10,886,2
10,886,10,887,3
10,887,11,901,0
11,901,11,901,1
11,901,12,917,0
12,917,12,917,1
12,917,13,934,0
13,934,13,934,1
13,934,14,943,0
14,943,14,943,1
14,943,15,958,0
15,958,15,958,1
15,958,16,971,0
16,971,16,971,1
16,971,17,982,0
17,982,17,983,2
17,983,17,984,3
17,984,18,1004,0
66:66
1,764,2,778,0
2,778,2,778,1
2,778,3,789,0
3,789,3,790,2
3,790,3,791,3
3,791,3,792,3
3,792,3,793,3
3,793,3,794,3
3,794,3,795,3
3,795,4,809,0
4,809,4,810,2
4,810,4,811,3
4,811,4,812,3
4,812,5,830,0
5,830,5,830,1
5,830,6,845,0
6,845,6,845,1
6,845,7,862,0
7,862,7,863,2
7,863,7,864,3
7,864,7,865,3
7,865,8,877,0
8,877,8,877,1
8,877,9,891,0
9,891,9,891,1
9,891,10,902,0
10,902,10,903,2
10,903,10,904,3
10,904,11,918,0
11,918,11,918,1
11,918,12,937,0
12,937,12,938,2
12,938,12,939,3
12,939,13,958,0
13,958,13,958,1
13,958,14,970,0
14,970,14,971,2
14,971,14,972,3
14,972,15,989,0
15,989,15,989,1
15,989,16,1001,0
16,1001,16,1001,1
16,1001,17,1008,0
17,1008,17,1008,1
17,1008,18,1026,0
67:67
1,839,2,853,0
2,853,2,853,1
2,853,3,864,0
3,864,3,865,2
3,865,3,866,3
3,866,4,880,0
4,880,4,881,2
4,881,4,882,3
4,882,5,900,0
5,900,5,900,1
5,900,6,915,0
6,915,6,915,1
6,915,7,932,0
7,932,7,933,2
7,933,7,934,3
7,934,7,935,3
7,935,8,950,0
8,950,8,951,2
8,951,8,952,3
8,952,8,953,3
8,953,8,954,3
8,954,8,955,3
8,955,8,956,3
8,956,9,972,0
9,972,9,972,1
9,972,10,983,0
10,983,10,984,2
10,984,10,985,3
10,985,11,999,0
11,999,11,999,1
11,999,12,1015,0
12,1015,12,1015,1
12,1015,13,1032,0
13,1032,13,1032,1
13,1032,14,1044,0
14,1044,14,1045,2
14,1045,14,1046,3
14,1046,15,1063,0
15,1063,15,1063,1
15,1063,16,1075,0
16,1075,16,1075,1
16,1075,17,1082,0
17,1082,17,1082,1
17,1082,18,1100,0
68:68
1,907,2,921,0
2,921,2,921,1
2,921,3,929,0
3,929,3,929,1
3,929,4,941,0
4,941,4,942,2
4,942,4,943,3
4,943,5,961,0
5,961,5,961,1
5,961,6,976,0
6,976,6,976,1
6,976,7,993,0
7,993,7,994,2
7,994,7,995,3
7,995,7,996,3
7,996,8,1008,0
8,1008,8,1008,1
8,1008,9,1025,0
9,1025,9,1026,2
9,1026,9,1027,3
9,1027,10,1037,0
10,1037,10,1037,1
10,1037,11,1049,0
11,1049,11,1049,1
11,1049,12,1068,0
12,1068,12,1069,2
12,1069,12,1070,3
12,1070,13,1089,0
13,1089,13,1089,1
13,1089,14,1101,0
14,1101,14,1102,2
14,1102,14,1103,3
14,1103,15,1120,0
15,1120,15,1120,1
15,1120,16,1135,0
16,1135,16,1136,2
16,1136,16,1137,3
16,1137,17,1146,0
17,1146,17,1146,1
17,1146,18,1164,0
69:69
1,920,2,934,0
2,934,2,934,1
2,934,3,942,0
3,942,3,942,1
3,942,4,951,0
4,951,4,951,1
4,951,5,970,0
5,970,5,971,2
5,971,5,972,3
5,972,6,989,0
6,989,6,989,1
6,989,7,1006,0
7,1006,7,1007,2
7,1007,7,1008,3
7,1008,7,1009,3
7,1009,8,1021,0
8,1021,8,1021,1
8,1021,9,1035,0
9,1035,9,1035,1
9,1035,10,1046,0
10,1046,10,1047,2
10,1047,10,1048,3
10,1048,11,1062,0
11,1062,11,1062,1
11,1062,12,1078,0
12,1078,12,1078,1
12,1078,13,1095,0
13,1095,13,1095,1
13,1095,14,1107,0
14,1107,14,1108,2
14,1108,14,1109,3
14,1109,15,1129,0
15,1129,15,1130,2
15,1130,15,1131,3
15,1131,16,1145,0
16,1145,16,1145,1
16,1145,17,1152,0
17,1152,17,1152,1
17,1152,18,1170,0
70:70
1,948,2,962,0
2,962,2,962,1
2,962,3,970,0
3,970,3,970,1
3,970,4,979,0
4,979,4,979,1
4,979,5,998,0
5,998,5,999,2
5,999,5,1000,3
5,1000,6,1017,0
6,1017,6,1017,1
6,1017,7,1034,0
7,1034,7,1035,2
7,1035,7,1036,3
7,1036,7,1037,3
7,1037,8,1052,0
8,1052,8,1053,2
8,1053,8,1054,3
8,1054,9,1070,0
9,1070,9,1070,1
9,1070,10,1081,0
10,1081,10,1082,2
10,1082,10,1083,3
10,1083,11,1097,0
11,1097,11,1097,1
11,1097,12,1113,0
12,1113,12,1113,1
12,1113,13,1130,0
13,1130,13,1130,1
13,1130,14,1142,0
14,1142,14,1143,2
14,1143,14,1144,3
14,1144,15,1161,0
15,1161,15,1161,1
15,1161,16,1173,0
16,1173,16,1173,1
16,1173,17,1180,0
17,1180,17,1180,1
17,1180,18,1198,0
71:71
1,1037,2,1051,0
2,1051,2,1051,1
2,1051,3,1059,0
3,1059,3,1059,1
3,1059,4,1071,0
4,1071,4,1072,2
4,1072,4,1073,3
4,1073,4,1074,3
4,1074,5,1092,0
5,1092,5,1092,1
5,1092,6,1107,0
6,1107,6,1107,1
6,1107,7,1124,0
7,1124,7,1125,2
7,1125,7,1126,3
7,1126,7,1127,3
7,1127,7,1128,3
7,1128,7,1129,3
7,1129,7,1130,3
7,1130,8,1142,0
8,1142,8,1142,1
8,1142,9,1156,0
9,1156,9,1156,1
9,1156,10,1167,0
10,1167,10,1168,2
10,1168,10,1169,3
10,1169,11,1183,0
11,1183,11,1183,1
11,1183,12,1199,0
12,1199,12,1199,1
12,1199,13,1216,0
13,1216,13,1216,1
13,1216,14,1228,0
14,1228,14,1229,2
14,1229,14,1230,3
14,1230,14,1231,3
14,1231,15,1248,0
15,1248,15,1248,1
15,1248,16,1260,0
16,1260,16,1260,1
16,1260,17,1267,0
17,1267,17,1267,1
17,1267,18,1285,0
72:72
1,1054,2,1068,0
2,1068,2,1068,1
2,1068,3,1079,0
3,1079,3,1080,2
3,1080,3,1081,3
3,1081,4,1092,0
4,1092,4,1092,1
4,1092,5,1111,0
5,1111,5,1112,2
5,1112,5,1113,3
5,1113,6,1130,0
6,1130,6,1130,1
6,1130,7,1147,0
7,1147,7,1148,2
7,1148,7,1149,3
7,1149,7,1150,3
7,1150,7,1151,3
7,1151,8,1166,0
8,1166,8,1167,2
8,1167,8,1168,3
8,1168,9,1184,0
9,1184,9,1184,1
9,1184,10,1192,0
10,1192,10,1192,1
10,1192,11,1204,0
11,1204,11,1204,1
11,1204,12,1223,0
12,1223,12,1224,2
12,1224,12,1225,3
12,1225,13,1244,0
13,1244,13,1244,1
13,1244,14,1256,0
14,1256,14,1257,2
14,1257,14,1258,3
14,1258,15,1275,0
15,1275,15,1275,1
15,1275,16,1287,0
16,1287,16,1287,1
16,1287,17,1294,0
17,1294,17,1294,1
17,1294,18,1312,0
73:73
1,1076,2,1090,0
2,1090,2,1090,1
2,1090,3,1101,0
3,1101,3,1102,2
3,1102,3,1103,3
3,1103,3,1104,3
3,1104,3,1105,3
3,1105,3,1106,3
3,1106,3,1107,3
3,1107,4,1118,0
4,1118,4,1118,1
4,1118,5,1137,0
5,1137,5,1138,2
5,1138,5,1139,3
5,1139,5,1140,3
5,1140,5,1141,3
5,1141,5,1142,3
5,1142,5,1143,3
5,1143,5,1144,3
5,1144,5,1145,3
5,1145,6,1165,0
6,1165,6,1166,2
6,1166,6,1167,3
6,1167,7,1186,0
7,1186,7,1187,2
7,1187,7,1188,3
7,1188,7,1189,3
7,1189,8,1201,0
8,1201,8,1201,1
8,1201,9,1215,0
9,1215,9,1215,1
9,1215,10,1227,0
10,1227,10,1228,2
10,1228,10,1229,3
10,1229,11,1243,0
11,1243,11,1243,1
11,1243,12,1262,0
12,1262,12,1263,2
12,1263,12,1264,3
12,1264,13,1283,0
13,1283,13,1283,1
13,1283,14,1292,0
14,1292,14,1292,1
14,1292,15,1307,0
15,1307,15,1307,1
15,1307,16,1319,0
16,1319,16,1319,1
16,1319,17,1329,0
17,1329,17,1330,2
17,1330,17,1331,3
17,1331,18,1351,0
74:74
1,1104,2,1118,0
2,1118,2,1118,1
2,1118,3,1126,0
3,1126,3,1126,1
3,1126,4,1138,0
4,1138,4,1139,2
4,1139,4,1140,3
4,1140,5,1158,0
5,1158,5,1158,1
5,1158,6,1176,0
6,1176,6,1177,2
6,1177,6,1178,3
6,1178,7,1197,0
7,1197,7,1198,2
7,1198,7,1199,3
7,1199,7,1200,3
7,1200,7,1201,3
7,1201,8,1213,0
8,1213,8,1214,2
8,1214,8,1215,3
8,1215,9,1231,0
9,1231,9,1231,1
9,1231,10,1242,0
10,1242,10,1243,2
10,1243,10,1244,3
10,1244,10,1245,3
10,1245,11,1259,0
11,1259,11,1259,1
11,1259,12,1278,0
12,1278,12,1279,2
12,1279,12,1280,3
12,1280,13,1299,0
13,1299,13,1299,1
13,1299,14,1308,0
14,1308,14,1308,1
14,1308,15,1323,0
15,1323,15,1323,1
15,1323,16,1336,0
16,1336,16,1336,1
16,1336,17,1343,0
17,1343,17,1343,1
17,1343,18,1361,0
75:75
1,1115,2,1129,0
2,1129,2,1129,1
2,1129,3,1140,0
3,1140,3,1141,2
3,1141,3,1142,3
3,1142,4,1153,0
4,1153,4,1153,1
4,1153,5,1172,0
5,1172,5,1173,2
5,1173,5,1174,3
5,1174,6,1191,0
6,1191,6,1191,1
6,1191,7,1208,0
7,1208,7,1209,2
7,1209,7,1210,3
7,1210,8,1223,0
8,1223,8,1223,1
8,1223,9,1240,0
9,1240,9,1241,2
9,1241,9,1242,3
9,1242,10,1252,0
10,1252,10,1252,1
10,1252,11,1264,0
11,1264,11,1264,1
11,1264,12,1283,0
12,1283,12,1284,2
12,1284,12,1285,3
12,1285,13,1304,0
13,1304,13,1304,1
13,1304,14,1316,0
14,1316,14,1317,2
14,1317,14,1318,3
14,1318,15,1335,0
15,1335,15,1335,1
15,1335,16,1347,0
16,1347,16,1347,1
16,1347,17,1354,0
17,1354,17,1354,1
17,1354,18,1372,0
76:76
1,1165,2,1179,0
2,1179,2,1179,1
2,1179,3,1187,0
3,1187,3,1187,1
3,1187,4,1196,0
4,1196,4,1196,1
4,1196,5,1215,0
5,1215,5,1216,2
5,1216,5,1217,3
5,1217,5,1218,3
5,1218,6,1235,0
6,1235,6,1235,1
6,1235,7,1252,0
7,1252,7,1253,2
7,1253,7,1254,3
7,1254,7,1255,3
7,1255,8,1267,0
8,1267,8,1267,1
8,1267,9,1284,0
9,1284,9,1285,2
9,1285,9,1286,3
9,1286,10,1296,0
10,1296,10,1296,1
10,1296,11,1308,0
11,1308,11,1308,1
11,1308,12,1327,0
12,1327,12,1328,2
12,1328,12,1329,3
12,1329,13,1348,0
13,1348,13,1348,1
13,1348,14,1357,0
14,1357,14,1357,1
14,1357,15,1375,0
15,1375,15,1376,2
15,1376,15,1377,3
15,1377,16,1391,0
16,1391,16,1391,1
16,1391,17,1398,0
17,1398,17,1398,1
17,1398,18,1416,0
77:77
1,1153,2,1167,0
2,1167,2,1167,1
2,1167,3,1175,0
3,1175,3,1175,1
3,1175,4,1184,0
4,1184,4,1184,1
4,1184,5,1203,0
5,1203,5,1204,2
5,1204,5,1205,3
5,1205,6,1222,0
6,1222,6,1222,1
6,1222,7,1239,0
7,1239,7,1240,2
7,1240,7,1241,3
7,1241,7,1242,3
7,1242,8,1257,0
8,1257,8,1258,2
8,1258,8,1259,3
8,1259,9,1275,0
9,1275,9,1275,1
9,1275,10,1286,0
10,1286,10,1287,2
10,1287,10,1288,3
10,1288,11,1302,0
11,1302,11,1302,1
11,1302,12,1321,0
12,1321,12,1322,2
12,1322,12,1323,3
12,1323,13,1342,0
13,1342,13,1342,1
13,1342,14,1351,0
14,1351,14,1351,1
14,1351,15,1366,0
15,1366,15,1366,1
15,1366,16,1378,0
16,1378,16,1378,1
16,1378,17,1388,0
17,1388,17,1389,2
17,1389,17,1390,3
17,1390,18,1410,0
78:78
1,1140,2,1154,0
2,1154,2,1154,1
2,1154,3,1165,0
3,1165,3,1166,2
3,1166,3,1167,3
3,1167,4,1178,0
4,1178,4,1178,1
4,1178,5,1197,0
5,1197,5,1198,2
5,1198,5,1199,3
5,1199,6,1216,0
6,1216,6,1216,1
6,1216,7,1233,0
7,1233,7,1234,2
7,1234,7,1235,3
7,1235,7,1236,3
7,1236,8,1248,0
8,1248,8,1248,1
8,1248,9,1262,0
9,1262,9,1262,1
9,1262,10,1273,0
10,1273,10,1274,2
10,1274,10,1275,3
10,1275,11,1292,0
11,1292,11,1293,2
11,1293,11,1294,3
11,1294,12,1312,0
12,1312,12,1312,1
12,1312,13,1329,0
13,1329,13,1329,1
13,1329,14,1341,0
14,1341,14,1342,2
14,1342,14,1343,3
14,1343,15,1360,0
15,1360,15,1360,1
15,1360,16,1372,0
16,1372,16,1372,1
16,1372,17,1379,0
17,1379,17,1379,1
17,1379,18,1397,0
79:79
1,1172,2,1186,0
2,1186,2,1186,1
2,1186,3,1197,0
3,1197,3,1198,2
3,1198,3,1199,3
3,1199,4,1213,0
4,1213,4,1214,2
4,1214,4,1215,3
4,1215,5,1236,0
5,1236,5,1237,2
5,1237,5,1238,3
5,1238,6,1255,0
6,1255,6,1255,1
6,1255,7,1272,0
7,1272,7,1273,2
7,1273,7,1274,3
7,1274,7,1275,3
7,1275,8,1287,0
8,1287,8,1287,1
8,1287,9,1301,0
9,1301,9,1301,1
9,1301,10,1312,0
10,1312,10,1313,2
10,1313,10,1314,3
10,1314,11,1328,0
11,1328,11,1328,1
11,1328,12,1347,0
12,1347,12,1348,2
12,1348,12,1349,3
12,1349,13,1368,0
13,1368,13,1368,1
13,1368,14,1377,0
14,1377,14,1377,1
14,1377,15,1392,0
15,1392,15,1392,1
15,1392,16,1404,0
16,1404,16,1404,1
16,1404,17,1411,0
17,1411,17,1411,1
17,1411,18,1429,0
80:80
7,900,8,913,0
8,913,8,913,1
8,913,9,927,0
9,927,9,927,1
9,927,10,935,0
10,935,10,935,1
10,935,11,947,0
11,947,11,947,1
11,947,12,963,0
12,963,12,963,1
12,963,13,980,0
13,980,13,980,1
13,980,14,989,0
14,989,14,989,1
14,989,15,1004,0
15,1004,15,1004,1
15,1004,16,1015,0
16,1015,16,1015,1
16,1015,17,1023,0
17,1023,17,1023,1
17,1023,18,1040,0
18,1040,18,1041,2
81:81
7,420,8,433,0
8,433,8,433,1
8,433,9,447,0
9,447,9,447,1
9,447,10,455,0
10,455,10,455,1
10,455,11,467,0
11,467,11,467,1
11,467,12,486,0
12,486,12,487,2
12,487,12,488,3
12,488,13,507,0
13,507,13,507,1
13,507,14,519,0
14,519,14,520,2
14,520,14,521,3
14,521,15,538,0
15,538,15,538,1
15,538,16,552,0
16,552,16,553,2
16,553,16,554,3
16,554,17,564,0
17,564,17,564,1
17,564,18,582,0
18,582,18,583,2
82:82
7,450,8,463,0
8,463,8,463,1
8,463,9,480,0
9,480,9,481,2
9,481,9,482,3
9,482,10,492,0
10,492,10,492,1
10,492,11,504,0
11,504,11,504,1
11,504,12,523,0
12,523,12,524,2
12,524,12,525,3
12,525,13,544,0
13,544,13,544,1
13,544,14,556,0
14,556,14,557,2
14,557,14,558,3
14,558,15,575,0
15,575,15,575,1
15,575,16,586,0
16,586,16,586,1
16,586,17,594,0
17,594,17,594,1
17,594,18,612,0
18,612,18,613,2
83:83
7,475,8,488,0
8,488,8,488,1
8,488,9,502,0
9,502,9,502,1
9,502,10,513,0
10,513,10,514,2
10,514,10,515,3
10,515,11,529,0
11,529,11,529,1
11,529,12,548,0
12,548,12,549,2
12,549,12,550,3
12,550,13,569,0
13,569,13,569,1
13,569,14,578,0
14,578,14,578,1
14,578,15,596,0
15,596,15,597,2
15,597,15,598,3
15,598,16,611,0
16,611,16,611,1
16,611,17,619,0
17,619,17,619,1
17,619,18,637,0
18,637,18,638,2
84:84
7,607,8,623,0
8,623,8,624,2
8,624,8,625,3
8,625,9,641,0
9,641,9,641,1
9,641,10,649,0
10,649,10,649,1
10,649,11,664,0
11,664,11,665,2
11,665,11,666,3
11,666,11,667,3
11,667,11,668,3
11,668,11,669,3
11,669,11,670,3
11,670,11,671,3
11,671,12,689,0
12,689,12,689,1
12,689,13,706,0
13,706,13,706,1
13,706,14,718,0
14,718,14,719,2
14,719,14,720,3
14,720,15,737,0
15,737,15,737,1
15,737,16,748,0
16,748,16,748,1
16,748,17,756,0
17,756,17,756,1
17,756,18,774,0
18,774,18,775,2
85:85
7,658,8,674,0
8,674,8,675,2
8,675,8,676,3
8,676,9,692,0
9,692,9,692,1
9,692,10,700,0
10,700,10,700,1
10,700,11,712,0
11,712,11,712,1
11,712,12,731,0
12,731,12,732,2
12,732,12,733,3
12,733,13,752,0
13,752,13,752,1
13,752,14,764,0
14,764,14,765,2
14,765,14,766,3
14,766,15,783,0
15,783,15,783,1
15,783,16,794,0
16,794,16,794,1
16,794,17,802,0
17,802,17,802,1
17,802,18,820,0
18,820,18,821,2
86:86
7,715,8,728,0
8,728,8,728,1
8,728,9,742,0
9,742,9,742,1
9,742,10,750,0
10,750,10,750,1
10,750,11,765,0
11,765,11,766,2
11,766,11,767,3
11,767,11,768,3
11,768,12,786,0
12,786,12,786,1
12,786,13,803,0
13,803,13,803,1
13,803,14,815,0
14,815,14,816,2
14,816,14,817,3
14,817,15,834,0
15,834,15,834,1
15,834,16,845,0
16,845,16,845,1
16,845,17,853,0
17,853,17,853,1
17,853,18,872,0
18,872,18,873,2
87:87
7,970,8,986,0
8,986,8,987,2
8,987,8,988,3
8,988,9,1004,0
9,1004,9,1004,1
9,1004,10,1015,0
10,1015,10,1016,2
10,1016,10,1017,3
10,1017,11,1031,0
11,1031,11,1031,1
11,1031,12,1050,0
12,1050,12,1051,2
12,1051,12,1052,3
12,1052,13,1071,0
13,1071,13,1071,1
13,1071,14,1080,0
14,1080,14,1080,1
14,1080,15,1095,0
15,1095,15,1095,1
15,1095,16,1106,0
16,1106,16,1106,1
16,1106,17,1114,0
17,1114,17,1114,1
17,1114,18,1132,0
18,1132,18,1133,2
88:88
7,1145,8,1158,0
8,1158,8,1158,1
8,1158,9,1172,0
9,1172,9,1172,1
9,1172,10,1183,0
10,1183,10,1184,2
10,1184,10,1185,3
10,1185,11,1199,0
11,1199,11,1199,1
11,1199,12,1218,0
12,1218,12,1219,2
12,1219,12,1220,3
12,1220,13,1239,0
13,1239,13,1239,1
13,1239,14,1248,0
14,1248,14,1248,1
14,1248,15,1266,0
15,1266,15,1267,2
15,1267,15,1268,3
15,1268,16,1282,0
16,1282,16,1282,1
16,1282,17,1289,0
17,1289,17,1289,1
17,1289,18,1307,0
18,1307,18,1308,2
89:89
7,1167,8,1180,0
8,1180,8,1180,1
8,1180,9,1194,0
9,1194,9,1194,1
9,1194,10,1205,0
10,1205,10,1206,2
10,1206,10,1207,3
10,1207,11,1221,0
11,1221,11,1221,1
11,1221,12,1240,0
12,1240,12,1241,2
12,1241,12,1242,3
12,1242,13,1261,0
13,1261,13,1261,1
13,1261,14,1270,0
14,1270,14,1270,1
14,1270,15,1285,0
15,1285,15,1285,1
15,1285,16,1300,0
16,1300,16,1301,2
16,1301,16,1302,3
16,1302,17,1311,0
17,1311,17,1311,1
17,1311,18,1329,0
18,1329,18,1330,2
90:90
7,426,8,439,0
8,439,8,439,1
8,439,9,453,0
9,453,9,453,1
9,453,10,464,0
10,464,10,465,2
10,465,10,466,3
10,466,11,480,0
11,480,11,480,1
11,480,12,499,0
12,499,12,500,2
12,500,12,501,3
12,501,13,520,0
13,520,13,520,1
13,520,14,532,0
14,532,14,533,2
14,533,14,534,3
14,534,15,551,0
15,551,15,551,1
15,551,16,562,0
16,562,16,562,1
16,562,17,573,0
17,573,17,574,2
17,574,17,575,3
17,575,18,595,0
91:91
7,431,8,447,0
8,447,8,448,2
8,448,8,449,3
8,449,8,450,3
8,450,8,451,3
8,451,8,452,3
8,452,8,453,3
8,453,8,454,3
8,454,8,455,3
8,455,9,471,0
9,471,9,471,1
9,471,10,480,0
10,480,10,480,1
10,480,11,494,0
11,494,11,495,2
11,495,11,496,3
11,496,12,514,0
12,514,12,514,1
12,514,13,532,0
13,532,13,532,1
13,532,14,544,0
14,544,14,545,2
14,545,14,546,3
14,546,15,566,0
15,566,15,567,2
15,567,15,568,3
15,568,16,581,0
16,581,16,581,1
16,581,17,589,0
17,589,17,589,1
17,589,18,607,0
92:92
7,460,8,473,0
8,473,8,473,1
8,473,9,488,0
9,488,9,488,1
9,488,10,499,0
10,499,10,500,2
10,500,10,501,3
10,501,10,502,3
10,502,11,516,0
11,516,11,516,1
11,516,12,535,0
12,535,12,536,2
12,536,12,537,3
12,537,13,556,0
13,556,13,556,1
13,556,14,565,0
14,565,14,565,1
14,565,15,580,0
15,580,15,580,1
15,580,16,594,0
16,594,16,595,2
16,595,16,596,3
16,596,17,606,0
17,606,17,606,1
17,606,18,624,0
93:93
7,490,8,506,0
8,506,8,507,2
8,507,8,508,3
8,508,9,524,0
9,524,9,524,1
9,524,10,535,0
10,535,10,536,2
10,536,10,537,3
10,537,11,551,0
11,551,11,551,1
11,551,12,570,0
12,570,12,571,2
12,571,12,572,3
12,572,13,591,0
13,591,13,591,1
13,591,14,603,0
14,603,14,604,2
14,604,14,605,3
14,605,15,622,0
15,622,15,622,1
15,622,16,633,0
16,633,16,633,1
16,633,17,644,0
17,644,17,645,2
17,645,17,646,3
17,646,18,666,0
94:94
7,570,8,583,0
8,583,8,583,1
8,583,9,600,0
9,600,9,601,2
9,601,9,602,3
9,602,10,612,0
10,612,10,612,1
10,612,11,624,0
11,624,11,624,1
11,624,12,643,0
12,643,12,644,2
12,644,12,645,3
12,645,13,664,0
13,664,13,664,1
13,664,14,676,0
14,676,14,677,2
14,677,14,678,3
14,678,15,695,0
15,695,15,695,1
15,695,16,706,0
16,706,16,706,1
16,706,17,714,0
17,714,17,714,1
17,714,18,732,0
95:95
7,739,8,752,0
8,752,8,752,1
8,752,9,769,0
9,769,9,770,2
9,770,9,771,3
9,771,10,781,0
10,781,10,781,1
10,781,11,793,0
11,793,11,793,1
11,793,12,812,0
12,812,12,813,2
12,813,12,814,3
12,814,13,833,0
13,833,13,833,1
13,833,14,842,0
14,842,14,842,1
14,842,15,857,0
15,857,15,857,1
15,857,16,871,0
16,871,16,872,2
16,872,16,873,3
16,873,17,883,0
17,883,17,883,1
17,883,18,901,0
96:96
7,778,8,791,0
8,791,8,791,1
8,791,9,808,0
9,808,9,809,2
9,809,9,810,3
9,810,10,820,0
10,820,10,820,1
10,820,11,835,0
11,835,11,836,2
11,836,11,837,3
11,837,12,855,0
12,855,12,855,1
12,855,13,872,0
13,872,13,872,1
13,872,14,884,0
14,884,14,885,2
14,885,14,886,3
14,886,15,903,0
15,903,15,903,1
15,903,16,914,0
16,914,16,914,1
16,914,17,922,0
17,922,17,922,1
17,922,18,940,0
97:97
7,919,8,932,0
8,932,8,932,1
8,932,9,946,0
9,946,9,946,1
9,946,10,957,0
10,957,10,958,2
10,958,10,959,3
10,959,11,973,0
11,973,11,973,1
11,973,12,992,0
12,992,12,993,2
12,993,12,994,3
12,994,13,1013,0
13,1013,13,1013,1
13,1013,14,1022,0
14,1022,14,1022,1
14,1022,15,1040,0
15,1040,15,1041,2
15,1041,15,1042,3
15,1042,15,1043,3
15,1043,15,1044,3
15,1044,15,1045,3
15,1045,15,1046,3
15,1046,15,1047,3
15,1047,16,1061,0
16,1061,16,1061,1
16,1061,17,1068,0
17,1068,17,1068,1
17,1068,18,1083,0
98:98
7,1074,8,1087,0
8,1087,8,1087,1
8,1087,9,1101,0
9,1101,9,1101,1
9,1101,10,1112,0
10,1112,10,1113,2
10,1113,10,1114,3
10,1114,11,1128,0
11,1128,11,1128,1
11,1128,12,1147,0
12,1147,12,1148,2
12,1148,12,1149,3
12,1149,13,1168,0
13,1168,13,1168,1
13,1168,14,1180,0
14,1180,14,1181,2
14,1181,14,1182,3
14,1182,15,1199,0
15,1199,15,1199,1
15,1199,16,1210,0
16,1210,16,1210,1
16,1210,17,1218,0
17,1218,17,1218,1
17,1218,18,1236,0
99:99
7,1193,8,1206,0
8,1206,8,1206,1
8,1206,9,1223,0
9,1223,9,1224,2
9,1224,9,1225,3
9,1225,10,1236,0
10,1236,10,1236,1
10,1236,11,1251,0
11,1251,11,1252,2
11,1252,11,1253,3
11,1253,12,1271,0
12,1271,12,1271,1
12,1271,13,1288,0
13,1288,13,1288,1
13,1288,14,1297,0
14,1297,14,1297,1
14,1297,15,1315,0
15,1315,15,1316,2
15,1316,15,1317,3
15,1317,16,1330,0
16,1330,16,1330,1
16,1330,17,1338,0
17,1338,17,1338,1
17,1338,18,1356,0
100:100
7,1260,8,1276,0
8,1276,8,1277,2
8,1277,8,1278,3
8,1278,9,1294,0
9,1294,9,1294,1
9,1294,10,1302,0
10,1302,10,1302,1
10,1302,11,1317,0
11,1317,11,1318,2
11,1318,11,1319,3
11,1319,12,1337,0
12,1337,12,1337,1
12,1337,13,1354,0
13,1354,13,1354,1
13,1354,14,1366,0
14,1366,14,1367,2
14,1367,14,1368,3
14,1368,15,1385,0
15,1385,15,1385,1
15,1385,16,1397,0
16,1397,16,1397,1
16,1397,17,1404,0
17,1404,17,1404,1
17,1404,18,1422,0
101:101
7,1280,8,1296,0
8,1296,8,1297,2
8,1297,8,1298,3
8,1298,9,1314,0
9,1314,9,1314,1
9,1314,10,1322,0
10,1322,10,1322,1
10,1322,11,1334,0
11,1334,11,1334,1
11,1334,12,1353,0
12,1353,12,1354,2
12,1354,12,1355,3
12,1355,13,1374,0
13,1374,13,1374,1
13,1374,14,1383,0
14,1383,14,1383,1
14,1383,15,1398,0
15,1398,15,1398,1
15,1398,16,1410,0
16,1410,16,1410,1
16,1410,17,1417,0
17,1417,17,1417,1
17,1417,18,1435,0
102:102
7,1300,8,1313,0
8,1313,8,1313,1
8,1313,9,1327,0
9,1327,9,1327,1
9,1327,10,1338,0
10,1338,10,1339,2
10,1339,10,1340,3
10,1340,11,1354,0
11,1354,11,1354,1
11,1354,12,1373,0
12,1373,12,1374,2
12,1374,12,1375,3
12,1375,13,1394,0
13,1394,13,1394,1
13,1394,14,1406,0
14,1406,14,1407,2
14,1407,14,1408,3
14,1408,15,1425,0
15,1425,15,1425,1
15,1425,16,1436,0
16,1436,16,1436,1
16,1436,17,1444,0
17,1444,17,1444,1
17,1444,18,1462,0
103:103
7,1307,8,1323,0
8,1323,8,1324,2
8,1324,8,1325,3
8,1325,9,1341,0
9,1341,9,1341,1
9,1341,10,1352,0
10,1352,10,1353,2
10,1353,10,1354,3
10,1354,11,1368,0
11,1368,11,1368,1
11,1368,12,1387,0
12,1387,12,1388,2
12,1388,12,1389,3
12,1389,13,1408,0
13,1408,13,1408,1
13,1408,14,1417,0
14,1417,14,1417,1
14,1417,15,1432,0
15,1432,15,1432,1
15,1432,16,1443,0
16,1443,16,1443,1
16,1443,17,1451,0
17,1451,17,1451,1
17,1451,18,1469,0
104:104
5,665,6,682,0
6,682,6,682,1
6,682,7,699,0
7,699,7,700,2
7,700,7,701,3
7,701,7,702,3
7,702,8,714,0
8,714,8,714,1
8,714,9,728,0
9,728,9,728,1
9,728,10,739,0
10,739,10,740,2
10,740,10,741,3
10,741,11,755,0
11,755,11,755,1
11,755,12,774,0
12,774,12,775,2
12,775,12,776,3
12,776,13,795,0
13,795,13,795,1
13,795,14,807,0
14,807,14,808,2
14,808,14,809,3
14,809,15,826,0
15,826,15,826,1
15,826,16,838,0
16,838,16,838,1
16,838,17,845,0
17,845,17,845,1
17,845,18,862,0
105:105
5,1035,6,1055,0
6,1055,6,1056,2
6,1056,6,1057,3
6,1057,6,1058,3
6,1058,6,1059,3
6,1059,6,1060,3
6,1060,6,1061,3
6,1061,6,1062,3
6,1062,6,1063,3
6,1063,6,1064,3
6,1064,6,1065,3
6,1065,6,1066,3
6,1066,6,1067,3
6,1067,6,1068,3
6,1068,6,1069,3
6,1069,6,1070,3
6,1070,6,1071,3
6,1071,6,1072,3
6,1072,6,1073,3
6,1073,6,1074,3
6,1074,6,1075,3
6,1075,6,1076,3
6,1076,6,1077,3
6,1077,6,1078,3
6,1078,6,1079,3
6,1079,6,1080,3
6,1080,6,1081,3
6,1081,6,1082,3
6,1082,6,1083,3
6,1083,7,1102,0
7,1102,7,1103,2
7,1103,7,1104,3
7,1104,7,1105,3
7,1105,7,1106,3
7,1106,7,1107,3
7,1107,7,1108,3
7,1108,8,1120,0
8,1120,8,1120,1
8,1120,9,1137,0
9,1137,9,1138,2
9,1138,9,1139,3
9,1139,10,1149,0
10,1149,10,1149,1
10,1149,11,1161,0
11,1161,11,1161,1
11,1161,12,1180,0
12,1180,12,1181,2
12,1181,12,1182,3
12,1182,13,1201,0
13,1201,13,1201,1
13,1201,14,1210,0
14,1210,14,1210,1
14,1210,15,1225,0
15,1225,15,1225,1
15,1225,16,1237,0
16,1237,16,1237,1
16,1237,17,1247,0
17,1247,17,1248,2
17,1248,17,1249,3
17,1249,18,1269,0
106:106
1,412,2,426,0
2,426,2,426,1
2,426,3,437,0
3,437,3,438,2
3,438,3,439,3
3,439,4,453,0
4,453,4,454,2
4,454,4,455,3
4,455,4,456,3
4,456,4,457,3
4,457,4,458,3
4,458,4,459,3
4,459,4,460,3
4,460,4,461,3
4,461,4,462,3
4,462,4,463,3
4,463,4,464,3
4,464,4,465,3
4,465,4,466,3
4,466,4,467,3
4,467,5,488,0
5,488,5,489,2
5,489,5,490,3
5,490,6,510,0
6,510,6,511,2
6,511,6,512,3
6,512,6,513,3
6,513,6,514,3
6,514,6,515,3
6,515,6,516,3
6,516,7,535,0
7,535,7,536,2
7,536,7,537,3
7,537,7,538,3
7,538,7,539,3
7,539,7,540,3
7,540,8,555,0
8,555,8,556,2
8,556,8,557,3
8,557,9,576,0
9,576,9,577,2
9,577,9,578,3
9,578,9,579,3
9,579,9,580,3
9,580,9,581,3
9,581,9,582,3
9,582,10,595,0
10,595,10,596,2
10,596,10,597,3
10,597,10,598,3
10,598,11,615,0
11,615,11,616,2
11,616,11,617,3
11,617,11,618,3
11,618,11,619,3
11,619,11,620,3
11,620,11,621,3
11,621,11,622,3
11,622,11,623,3
11,623,11,624,3
11,624,11,625,3
11,625,11,626,3
11,626,12,647,0
12,647,12,648,2
12,648,12,649,3
12,649,12,650,3
12,650,13,669,0
13,669,13,669,1
13,669,14,681,0
14,681,14,682,2
14,682,14,683,3
14,683,15,703,0
15,703,15,704,2
15,704,15,705,3
15,705,15,706,3
15,706,15,707,3
15,707,15,708,3
15,708,15,709,3
15,709,15,710,3
15,710,15,711,3
15,711,15,712,3
15,712,15,713,3
15,713,16,730,0
16,730,16,731,2
16,731,16,732,3
16,732,16,733,3
16,733,16,734,3
16,734,16,735,3
16,735,16,736,3
16,736,16,737,3
16,737,16,738,3
16,738,16,739,3
16,739,16,740,3
16,740,16,741,3
16,741,16,742,3
16,742,16,743,3
16,743,16,744,3
16,744,16,745,3
16,745,16,746,3
16,746,16,747,3
16,747,16,748,3
16,748,16,749,3
16,749,16,750,3
16,750,16,751,3
16,751,16,752,3
16,752,16,753,3
16,753,16,754,3
16,754,16,755,3
16,755,16,756,3
16,756,16,757,3
16,757,16,758,3
16,758,16,759,3
16,759,16,760,3
16,760,16,761,3
16,761,17,773,0
17,773,17,774,2
17,774,17,775,3
17,775,18,793,0
107:107
7,803,8,819,0
8,819,8,820,2
8,820,8,821,3
8,821,8,822,3
8,822,8,823,3
8,823,8,824,3
8,824,8,825,3
8,825,9,844,0
9,844,9,845,2
9,845,9,846,3
9,846,10,859,0
10,859,10,860,2
10,860,10,861,3
10,861,10,862,3
10,862,10,863,3
10,863,10,864,3
10,864,10,865,3
10,865,10,866,3
10,866,10,867,3
10,867,10,868,3
10,868,10,869,3
10,869,11,886,0
11,886,11,887,2
11,887,11,888,3
11,888,12,909,0
12,909,12,910,2
12,910,12,911,3
12,911,12,912,3
12,912,12,913,3
12,913,12,914,3
12,914,12,915,3
12,915,12,916,3
12,916,12,917,3
12,917,12,918,3
12,918,12,919,3
12,919,12,920,3
12,920,13,939,0
13,939,13,939,1
13,939,14,951,0
14,951,14,952,2
14,952,14,953,3
14,953,15,973,0
15,973,15,974,2
15,974,15,975,3
15,975,15,976,3
15,976,15,977,3
15,977,15,978,3
15,978,15,979,3
15,979,16,996,0
16,996,16,997,2
16,997,16,998,3
16,998,16,999,3
16,999,16,1000,3
16,1000,16,1001,3
16,1001,16,1002,3
16,1002,16,1003,3
16,1003,17,1016,0
17,1016,17,1017,2
17,1017,17,1018,3
17,1018,17,1019,3
17,1019,17,1020,3
17,1020,17,1021,3
17,1021,17,1022,3
17,1022,17,1023,3
17,1023,17,1024,3
17,1024,17,1025,3
17,1025,17,1026,3
17,1026,18,1043,0
